# Supplementary material for: Exploration of whether socioeconomic factors affect the results of priority setting partnerships: updating the top 10 research priorities for the management of Parkinson’s in an international setting
Source: HighWire-hosted journal article supplement (doi:10.1136/bmjopen-2021-049530), 2022-06-01
Supplement: bmjopen-2021-049530supp001_data_supplement.pdf [file bmjopen-2021-049530supp001_data_supplement.pdf]

## CENTRE-PD Top 10 Supplementary Material

## CENTRE-PD Top 10 Supplementary Material

## Table of Contents

|                                                                             |           |
|-----------------------------------------------------------------------------|-----------|
| <b>CENTRE-PD Top 10 Supplementary Material.....</b>                         | <b>1</b>  |
| Table 1. Glossary .....                                                     | 3         |
| Figure 1. Top 10 from 2014 Final Prioritisation.....                        | 4         |
| Figure 2. Top 26 from 2014 Interim Prioritisation .....                     | 5         |
| Table 2. PSP Group Sizes .....                                              | 6         |
| Table 3. Survey Responses by Participant Type and Local Institute .....     | 7         |
| Table 4. Healthcare professional responder's by role type.....              | 7         |
| Figure 3. Histogram and Statistics for Duration of Disease.....             | 8         |
| Table 5. Ethnicity Count for UOXF.....                                      | 8         |
| Figure 4. Bar Chart of PwP Education Level Frequencies .....                | 8         |
| Figure 5. Bar Chart of PwP Living Arrangements.....                         | 9         |
| <b>Box Plot and Whiskers for Analyses .....</b>                             | <b>9</b>  |
| Figure 6. Box Plot and Whisker for Pooled Survey Round.....                 | 9         |
| Figure 7. Box Plot and Whisker for Priority Questions by HCP and PwP .....  | 10        |
| Figure 8. Box Plot and Whisker by Disease Duration .....                    | 10        |
| Figure 9. Box Plot and Whisker by Education Level .....                     | 11        |
| Figure 10. Box Plot and Whisker by Living Arrangements.....                 | 11        |
| Figure 11. Box Plot and Whisker of Survey Results by Local Institute.....   | 12        |
| Figure 12. Box Plot and Whisker Comparing Results by Gender.....            | 12        |
| Figure 13. Box Plot and Whisker by Economic Status .....                    | 13        |
| Figure 14. Box Plot and Whisker Comparing Results by Grouped Ethnicity..... | 13        |
| <b>Top 10 by Sub group .....</b>                                            | <b>14</b> |
| Table 6. Top 10 by PwP and HCP.....                                         | 14        |
| Table 7. Top 10 by Disease Duration Quartiles .....                         | 15        |
| Table 8. Top 10 by Education Level .....                                    | 16        |
| Table 9. Top 10 by Living Arrangements .....                                | 17        |
| Table 10. Top 10 by Local Institute .....                                   | 18        |
| Table 11. Top 10 Priorities by Gender .....                                 | 19        |
| Table 12. Top 10 by Economic Status.....                                    | 20        |
| Table 13. Top 10 by Ethnicity Groups.....                                   | 20        |
| <b>Kappa Tables.....</b>                                                    | <b>21</b> |
| Table 14. Kappa Agreement between Disease Duration Groups.....              | 21        |
| Table 15. Kappa Agreement between Education Levels .....                    | 21        |
| Table 16. Kappa test of Agreement by Living Arrangement (grouped).....      | 21        |

## CENTRE-PD Top 10 Supplementary Material

|                                                                                          |           |
|------------------------------------------------------------------------------------------|-----------|
| Table 17. Kappa Test for Agreement between Local Institutes .....                        | 21        |
| Table 18. Kappa for Gender .....                                                         | 22        |
| Table 19. Kappa for Economic Status.....                                                 | 22        |
| Table 20. Kappa test between HCP and PwP .....                                           | 22        |
| Table 21. Kappa test with Deane et al Top 10 by Focus group .....                        | 22        |
| Table 22. Kappa test with Deane et al by interim ranking .....                           | 23        |
| <b>Distribution Analyses .....</b>                                                       | <b>24</b> |
| Table 23. Distribution Comparisons of each question by subgroup .....                    | 24        |
| Table 24. Pairwise comparison of significant KW Disease Duration for Question 4. ....    | 28        |
| Table 25. Pairwise comparison of significant KW Education Level for Question 1. ....     | 28        |
| Table 26. Pairwise comparison of significant KW Education Level for Question 2. ....     | 28        |
| Table 27. Pairwise comparison of significant KW Education Level for Question 6. ....     | 28        |
| Table 28. Pairwise comparison of significant KW Education Level for Question 8. ....     | 29        |
| Table 29. Pairwise comparison of significant KW Education Level for Question 10. ....    | 29        |
| Table 30. Pairwise comparison of significant KW Education Level for Question 11. ....    | 29        |
| Table 31. Pairwise comparison of significant KW Education Level for Question 12. ....    | 29        |
| Table 32. Pairwise comparison of significant KW Education Level for Question 15. ....    | 30        |
| Table 33. Pairwise comparison of significant KW Education Level for Question 16. ....    | 30        |
| Table 34. Pairwise comparison of significant KW Education Level for Question 17. ....    | 30        |
| Table 35. Pairwise comparison of significant KW Education Level for Question 18. ....    | 30        |
| Table 36. Pairwise comparison of significant KW Education Level for Question 19. ....    | 31        |
| Table 37. Pairwise comparison of significant KW Education Level for Question 20. ....    | 31        |
| Table 38. Pairwise comparison of significant KW Education Level for Question 21. ....    | 31        |
| Table 39. Pairwise comparison of significant KW Education Level for Question 22. ....    | 31        |
| Table 40. Pairwise comparison of significant KW Education Level for Question 23. ....    | 32        |
| Table 41. Pairwise comparison of significant KW Education Level for Question 25. ....    | 32        |
| Table 42. Pairwise comparison of significant KW Education Level for Question 26. ....    | 32        |
| Table 43. Pairwise comparison of significant KW Education Level for Question 27. ....    | 32        |
| Table 44. Pairwise comparison of significant KW Living Arrangements for Question 5.....  | 33        |
| Table 45. Pairwise comparison of significant KW Living Arrangements for Question 7.....  | 33        |
| Table 46. Pairwise comparison of significant KW Living Arrangements for Question 15..... | 33        |
| Table 47. Pairwise comparison of significant KW Living Arrangements for Question 17..... | 33        |
| Table 48. Pairwise comparison of significant KW Local Institute for Question 1. ....     | 34        |
| Table 49. Pairwise comparison of significant KW Local Institute for Question 2. ....     | 34        |
| Table 50. Pairwise comparison of significant KW Local Institute for Question 4. ....     | 34        |
| Table 51. Pairwise comparison of significant KW Local Institute for Question 5. ....     | 34        |
| Table 52. Pairwise comparison of significant KW Local Institute for Question 6. ....     | 34        |
| Table 53. Pairwise comparison of significant KW Local Institute for Question 7. ....     | 35        |
| Table 54. Pairwise comparison of significant KW Local Institute for Question 8 .....     | 35        |
| Table 55. Pairwise comparison of significant KW Local Institute for Question 9 .....     | 35        |

## CENTRE-PD Top 10 Supplementary Material

|                                                                                      |    |
|--------------------------------------------------------------------------------------|----|
| Table 56. Pairwise comparison of significant KW Local Institute for Question 10..... | 35 |
| Table 57. Pairwise comparison of significant KW Local Institute for Question 11..... | 35 |
| Table 58. Pairwise comparison of significant KW Local Institute for Question 12..... | 36 |
| Table 59. Pairwise comparison of significant KW Local Institute for Question 13..... | 36 |
| Table 60. Pairwise comparison of significant KW Local Institute for Question 14..... | 36 |
| Table 61. Pairwise comparison of significant KW Local Institute for Question 15..... | 36 |
| Table 62. Pairwise comparison of significant KW Local Institute for Question 16..... | 36 |
| Table 63. Pairwise comparison of significant KW Local Institute for Question 17..... | 37 |
| Table 64. Pairwise comparison of significant KW Local Institute for Question 18..... | 37 |
| Table 65. Pairwise comparison of significant KW Local Institute for Question 19..... | 37 |
| Table 66. Pairwise comparison of significant KW Local Institute for Question 20..... | 37 |
| Table 67. Pairwise comparison of significant KW Local Institute for Question 21..... | 37 |
| Table 68. Pairwise comparison of significant KW Local Institute for Question 22..... | 38 |
| Table 69. Pairwise comparison of significant KW Local Institute for Question 23..... | 38 |
| Table 70. Pairwise comparison of significant KW Local Institute for Question 24..... | 38 |
| Table 71. Pairwise comparison of significant KW Local Institute for Question 25..... | 38 |
| Table 72. Pairwise comparison of significant KW Local Institute for Question 26..... | 38 |
| Table 73. Pairwise comparison of significant KW Local Institute for Question 27..... | 39 |

Table 1. Glossary

|       |                                                    |
|-------|----------------------------------------------------|
| ≥7    | High Importance (greater or equal to 7 in rating). |
| BAME  | Black, Asian and Minority Ethnicity                |
| CUREC | Central University Research Ethics Committee       |
| EKUT  | Eberhard Karls University of Tübingen              |
| HCP   | Healthcare Professionals/Researchers in Health     |
| IQR   | Interquartile Range                                |
| JLA   | James Lind Alliance                                |
| K     | Kappa                                              |
| KW    | Kruskal-Wallis                                     |
| MCI   | Mild Cognitive Impairment                          |
| MWW   | Mann-Whitney Wilcoxon                              |
| NGT   | Nominal Group Technique                            |
| NICE  | National Institute of Clinical Excellence          |
| OPDC  | Oxford Parkinson's Disease Centre                  |
| PPI   | Patient Public Involvement                         |
| PSP   | Patient Setting Priority                           |
| PwP   | People with Parkinson's                            |
| REC   | Research Ethics Committee                          |
| SBC   | Supported by carers/in care home                   |
| SD    | Standard Deviation                                 |
| UL    | University of Luxembourg                           |
| UOXF  | University of Oxford                               |
| WHO   | World Health Organisation                          |

## CENTRE-PD Top 10 Supplementary Material

Figure 1. Top 10 from 2014 Final Prioritisation.

**Table 3** Final prioritised and ranked uncertainties for the management of Parkinson's disease

| <b>Overarching research aspiration: an effective cure for Parkinson's disease</b> |                                                                                                                                                                                                  |
|-----------------------------------------------------------------------------------|--------------------------------------------------------------------------------------------------------------------------------------------------------------------------------------------------|
| 1                                                                                 | What treatments are helpful for reducing balance problems and falls in people with Parkinson's?                                                                                                  |
| 2                                                                                 | What approaches are helpful for reducing stress and anxiety in people with Parkinson's?                                                                                                          |
| 3                                                                                 | What treatments are helpful for reducing dyskinesias (involuntary movements, which are a side effect of some medications) in people with Parkinson's?                                            |
| 4                                                                                 | Is it possible to identify different types of Parkinson's, eg, tremor dominant? And can we develop treatments to address these different types?                                                  |
| 5                                                                                 | What best treats dementia in people with Parkinson's?                                                                                                                                            |
| 6                                                                                 | What best treats mild cognitive problems such as memory loss, lack of concentration, indecision and slowed thinking in people with Parkinson's?                                                  |
| 7                                                                                 | What is the best method of monitoring a person with Parkinson's response to treatments?                                                                                                          |
| 8                                                                                 | What is helpful for improving the quality of sleep in people with Parkinson's?                                                                                                                   |
| 9                                                                                 | What helps improve the dexterity (fine motor skills or coordination of small muscle movements) of people with Parkinson's so they can do up buttons, use computers, phones, remote controls etc? |
| 10                                                                                | What treatments are helpful in reducing urinary problems (urgency, irritable bladder, incontinence) in people with Parkinson's?                                                                  |

## CENTRE-PD Top 10 Supplementary Material

Figure 2. Top 26 from 2014 Interim Prioritisation

| Uncertainty                                                                                                                                                                                  | PwP Score | Carer Score | F&F Score | HSCP Score | Total | Interim rank |
|----------------------------------------------------------------------------------------------------------------------------------------------------------------------------------------------|-----------|-------------|-----------|------------|-------|--------------|
| What treatments are helpful in reducing tremor in people with Parkinson's?                                                                                                                   | 93        | 83          | 92        | 91         | 359   | 1            |
| What treatments are helpful for reducing balance problems and falls in people with Parkinson's?                                                                                              | 92        | 93          | 80        | 94         | 359   | 1            |
| Is it possible to identify different types of Parkinson's, eg, tremor dominant? And can we tailor treatments best according to these different types?                                        | 88        | 88          | 89        | 88         | 353   | 3            |
| What treatments would ensure the medications were equally effective each day (prevented/managed wearing off, variability, on/off states) in people with Parkinson's?                         | 89        | 94          | 88        | 81         | 352   | 4            |
| Would the monitoring of dopamine levels in the body (eg, with blood tests) be helpful in determining medication timing and amount (dose)?                                                    | 91        | 89          | 86        | 86         | 352   | 4            |
| What is helpful for improving the quality of sleep in people with Parkinson's?                                                                                                               | 94        | 79.5        | 93        | 84         | 350.5 | 6            |
| What best treats mild cognitive problems such as memory loss, lack of concentration, indecision and slowed thinking in people with Parkinson's?                                              | 87        | 91          | 77        | 89.5       | 344.5 | 7            |
| What treatments are helpful in reducing urinary problems (urgency, irritable bladder, incontinence) in people with Parkinson's?                                                              | 90        | 77          | 94        | 79         | 340   | 8            |
| What drug treatments are best for the different stages of Parkinson's?                                                                                                                       | 83        | 87          | 87        | 77.5       | 334.5 | 9            |
| What approaches are helpful for reducing stress and anxiety in people with Parkinson's?                                                                                                      | 75        | 77          | 82        | 92         | 326   | 10           |
| What treatments are helpful for reducing dyskinesias (involuntary movements, which are a side effect of some medications) in people with Parkinson's?                                        | 80        | 90          | 73.5      | 77.5       | 321   | 11           |
| What best treats dementia in people with Parkinson's?                                                                                                                                        | 56        | 92          | 75        | 93         | 316   | 12           |
| What interventions are effective for reducing or managing unexplained fatigue in people with Parkinson's?                                                                                    | 78        | 65          | 85        | 85         | 313   | 13           |
| What best helps prevent or reduce freezing (of gait and in general) in people with Parkinson's?                                                                                              | 79        | 71.5        | 76        | 82         | 308.5 | 14           |
| What treatments are helpful for swallowing problems (dysphagia) in people with Parkinson's?                                                                                                  | 66        | 74.5        | 81        | 80         | 301.5 | 15           |
| What is the best method of monitoring a person with Parkinson's response to treatments?                                                                                                      | 81        | 52.5        | 83.5      | 83         | 300   | 16           |
| What training, techniques or aids are needed for hospital staff, to make sure patients with Parkinson's get their medications correctly and on time?                                         | 53        | 86          | 64.5      | 89.5       | 293   | 17           |
| What treatments are helpful in reducing bowel problems (constipation, incontinence) in people with Parkinson's?                                                                              | 77        | 85          | 90        | 40         | 292   | 18           |
| What is the best type and dose of exercise (physiotherapy) for improving muscle strength, flexibility, fitness, balance and function in people with Parkinson's?                             | 84        | 68          | 64.5      | 67.5       | 284   | 19           |
| Can medications be developed to allow fewer doses per day for people with Parkinson's? (For example combinations of medications in one pill, slow release pills)                             | 73        | 84          | 56        | 69         | 282   | 20           |
| What helps improve dexterity (fine motor skills or coordination of small muscle movements) of people with Parkinson's so they can do up buttons, use computers, phones, remote controls etc? | 85        | 59.5        | 73.5      | 54.5       | 272.5 | 21           |
| What treatments are effective in reducing hallucinations (including vivid dreams) in people with Parkinson's?                                                                                | 52        | 79.5        | 71.5      | 61         | 264   | 22           |
| What is the best treatment for stiffness (rigidity) in people with Parkinson's?                                                                                                              | 86        | 67          | 63        | 46         | 262   | 23           |
| At which stage of Parkinson's is deep brain stimulation (a surgical treatment that involves implanting a 'brain pacemaker' that sends signals to specific parts of the brain) most helpful?  | 69        | 59.5        | 91        | 42         | 261.5 | 24           |
| What training to improve knowledge and skills do informal carers (family and friends) need in order to best care for people with Parkinson's?                                                | 42        | 82          | 70        | 63.5       | 257.5 | 25           |
| What is the best treatment for pain in people with Parkinson's?                                                                                                                              | 82        | 54          | 60.5      | 57.5       | 254   | 26           |

F&F, family and friends; HSCP, health and social care professionals; PwP, people with Parkinson's.

## CENTRE-PD Top 10 Supplementary Material

Table 2. PSP Group Sizes

| PSP Group                                  | Year | Interim N= | Workshop N= | Note                                              |
|--------------------------------------------|------|------------|-------------|---------------------------------------------------|
| Acne                                       | 2014 | 1573       | 43          |                                                   |
| Eczema                                     |      | 493        |             |                                                   |
| Vitiligo                                   |      | 461        |             |                                                   |
| Alcohol-related Liver Disease              | 2017 | 230        |             |                                                   |
| Anaesthesia and Perioperative Care         | 2015 | 1718       | 23          | Mostly clinicians                                 |
| Autism                                     | 2015 | 1266       |             |                                                   |
| Bipolar                                    | 2016 | 2200       | 26          |                                                   |
| Blood transfusion                          | 2015 | 568        | 13          |                                                   |
| Broken bones in old people                 | 2018 | 209        |             |                                                   |
| Carcinoma                                  | 2015 | 141        | 29          |                                                   |
| Cellulitis                                 | 2017 | 353        | 28          |                                                   |
| Childhood disability                       | 2015 | 75         | 21          |                                                   |
| Common conditions effecting hand and wrist | 2017 | 261        | 21          |                                                   |
| Contraception                              | 2017 | 407        | 10          |                                                   |
| Cystic Fibrosis                            | 2017 | 677        |             |                                                   |
| Dementia                                   | 2013 | 36         | 18          | 36 organisations                                  |
| Depression                                 | 2016 | 1700       | 16          |                                                   |
| Diabetes Mellitus Type 1                   | 2011 | 47         | 23          |                                                   |
| Diabetes Mellitus Type 2                   | 2017 | 1500       | 26          |                                                   |
| Hip and knee osteoarthritis                | 2013 | 266        | 25          |                                                   |
| Digital Technology for Mental Health       | 2018 | 137        | 27          |                                                   |
| Eczema                                     | 2012 | 514        | 40          |                                                   |
| Emergency Medicine                         | 2017 | 513        | 34          |                                                   |
| Endometriosis                              | 2017 | 1418       | 26          |                                                   |
| Fibromyalgia                               | 2017 |            | 18          |                                                   |
| Head and Neck Cancer                       | 2017 | 49         | 20          |                                                   |
| Hidradenitis Suppurativa                   | 2014 | 371        | 22          |                                                   |
| Hypertension                               | 2017 | 63         | 15          |                                                   |
| Irritable Bowel Syndrome                   | 2017 |            | 16          |                                                   |
| Intensive Care Unit                        | 2014 | 513        |             |                                                   |
| kidney transplant                          | 2016 | 256        | 20          |                                                   |
| Idiopathic Intracranial Hypertension       | 2018 | 401        | 25          |                                                   |
| Learning Difficulties                      | 2017 | 361        | 25          |                                                   |
| Lichen Sclerosis                           |      | 954        | 29          |                                                   |
| Life after stroke                          | 2011 | 97         | 28          |                                                   |
| Lyme Disease                               | 2011 | 103        | 9           |                                                   |
| Mesothelioma                               | 2014 | 202        | 30          |                                                   |
| Mild to Moderate Hearing Loss              | 2015 | 486        | 7           |                                                   |
| Miscarriage                                | 2017 | 2122       | 21          |                                                   |
| Multiple Conditions in Later Life          | 2018 |            | 24          |                                                   |
| Multiple Sclerosis                         | 2013 | 669        | 35          |                                                   |
| Neurodevelopmental Disorders               | 2017 | 177        | 31          |                                                   |
| Neuro-oncology                             | 2015 | 227        | 18          |                                                   |
| Palliative and end of life care            | 2015 | 1331       | 24          |                                                   |
| Parkinson's                                | 2014 | 475        | 27          |                                                   |
| Patient Safety in Primary Care             | 2017 | 447        | 22          |                                                   |
| Pessary use for Prolapse                   | 2017 | 278        | 23          |                                                   |
| Physiotherapy                              | 2018 | 635        | 27          |                                                   |
| Pressure Ulcers                            | 2013 | 141        | 27          |                                                   |
| Preterm Birth                              | 2014 | 537        | 34          |                                                   |
| Prostate Cancer                            | 2010 |            | 26          | 40 "groups" in first survey no interim data       |
| Rare Inherited Anaemias                    | 2018 | 120        | 31          |                                                   |
| Scoliosis                                  | 2017 | 750        | 22          |                                                   |
| Sight Loss and Vision                      | 2015 | 664        | 12.9        | Mean from 12 types of workshops, total 155 people |
| spinal cord injury                         | 2016 | 293        | 20          |                                                   |
| Stillbirth                                 | 2015 | 1118       | 18          | Counted in photo from focus group                 |
| Stroke                                     | 2012 | 97         | 28          |                                                   |
| Teenage and Young Adult Cancer             | 2018 | 174        | 25          |                                                   |
| Tinnitus                                   | 2012 | 630        | 18          | P                                                 |
| Urinary Incontinence                       | 2008 | 11         | 13          | 11 "organisations"                                |
| Vitiligo                                   | 2010 | 230        | 47          | 6 observers                                       |
| Womb Cancer                                | 2016 | 253        | 23          |                                                   |
| <b>Average (mean)</b>                      |      | <b>552</b> | <b>24</b>   |                                                   |
| <b>Median</b>                              |      | <b>386</b> | <b>24</b>   |                                                   |

Data from 96 PSP groups which had published data on 24/OCT/2018

## CENTRE-PD Top 10 Supplementary Material

Table 3. Survey Responses by Participant Type and Local Institute

|                  |                      | Local Institute |            |            |            |
|------------------|----------------------|-----------------|------------|------------|------------|
|                  |                      | UL Count        | EKUT Count | UOXF Count | Total      |
| Participant Type | PwP                  | 116             | 158        | 237        | 511        |
|                  | Carer/Former Carer   | 1               | 1          | 36         | 38         |
|                  | Friend/Family Member | 113             | 10         | 73         | 196        |
|                  | HCP                  | 73              | 7          | 32         | 112        |
|                  | Person with RBD      | 0               | 0          | 22         | 22         |
|                  | <b>Total</b>         | <b>303</b>      | <b>176</b> | <b>400</b> | <b>879</b> |

Table 4. Healthcare professional responder's by role type.

| Health Care Professional Role       | Count      |
|-------------------------------------|------------|
| Charity Worker                      | 1          |
| Dietician                           | 1          |
| Doctor                              | 26         |
| Educator                            | 1          |
| GP                                  | 3          |
| Laboratory / Scientist              | 2          |
| Neurologist                         | 3          |
| Neuropsychologist                   | 1          |
| Not Specified                       | 8          |
| Nurse or Research Nurse             | 17         |
| Occupational Therapist              | 11         |
| PhD Student                         | 1          |
| Physiotherapist                     | 10         |
| Psychiatrist                        | 1          |
| Psychologist                        | 2          |
| Research Administrator              | 1          |
| Research Assistant                  | 1          |
| Researcher                          | 4          |
| Scientific Research Project Manager | 3          |
| Social Worker                       | 2          |
| Speech and Language Therapist       | 12         |
| Student Nurse                       | 1          |
| <b>Total</b>                        | <b>112</b> |

### CENTRE-PD Top 10 Supplementary Material

Figure 3. Histogram and Statistics for Duration of Disease

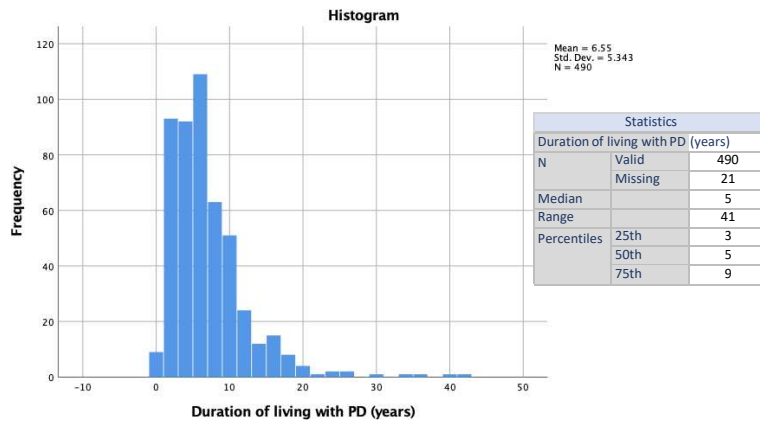

Table 5. Ethnicity Count for UOXF

| Ethnic Group                 | Frequency  | Percent (%) |
|------------------------------|------------|-------------|
| Other/Please Specify         | 3          | 1.3         |
| Asian/Asian British          | 6          | 2.5         |
| Arab                         | 1          | 0.4         |
| Black/Black British          | 3          | 1.3         |
| White                        | 217        | 91.6        |
| Mixed/multiple ethnic groups | 2          | 0.8         |
| Prefer not to say            | 5          | 2.1         |
| <b>Total</b>                 | <b>237</b> | <b>100</b>  |

Figure 4. Bar Chart of PwP Education Level Frequencies

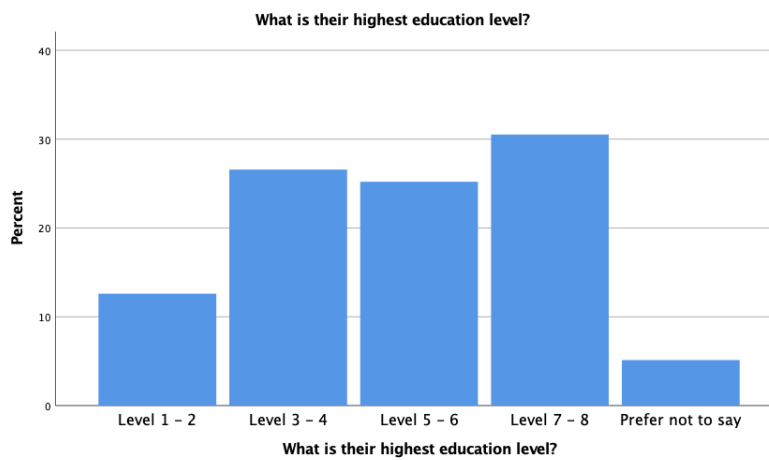



### CENTRE-PD Top 10 Supplementary Material

Figure 5. Bar Chart of PwP Living Arrangements

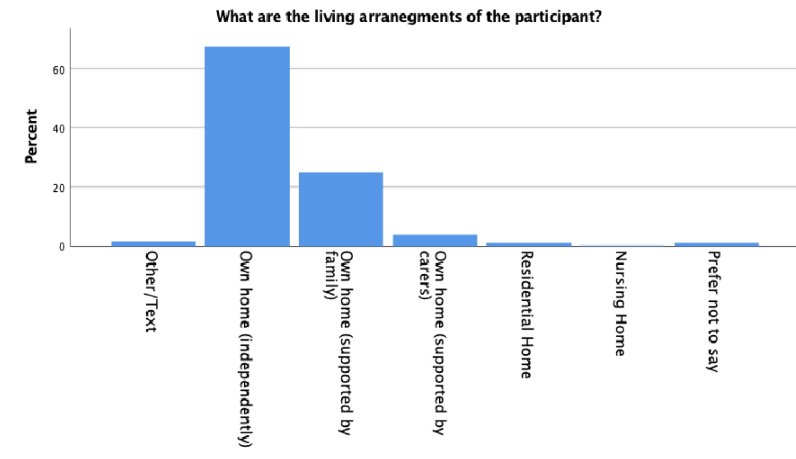

### Box Plot and Whiskers for Analyses

Figure 6. Box Plot and Whisker for Pooled Survey Round

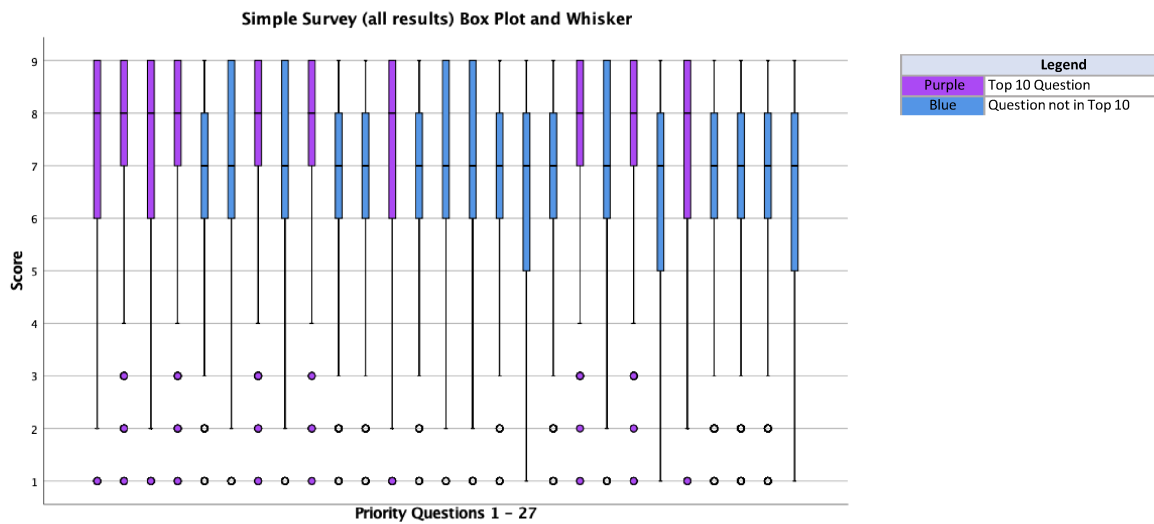

CENTRE-PD Top 10 Supplementary Material

Figure 7. Box Plot and Whisker for Priority Questions by HCP and PwP

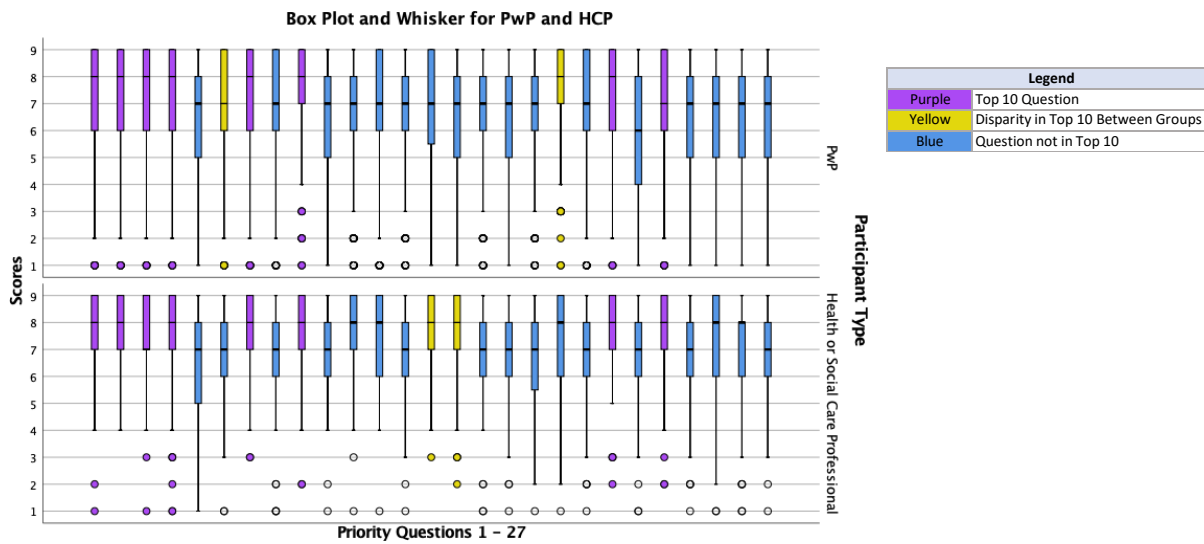

Figure 8. Box Plot and Whisker by Disease Duration

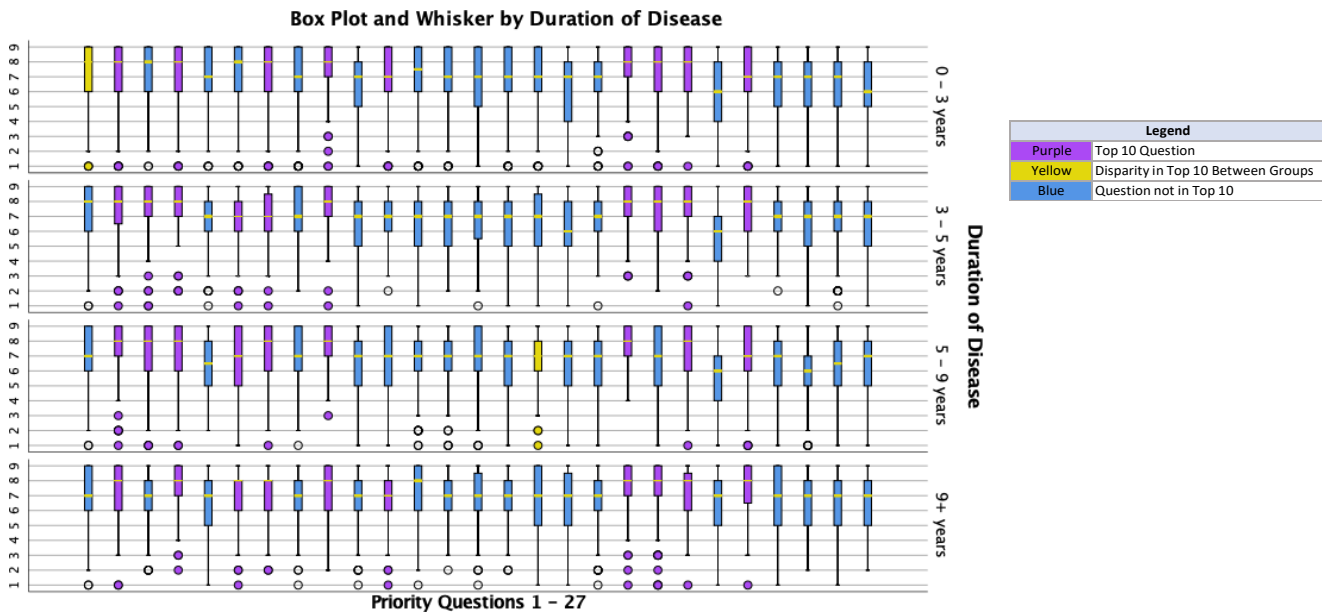

CENTRE-PD Top 10 Supplementary Material

Figure 9. Box Plot and Whisker by Education Level

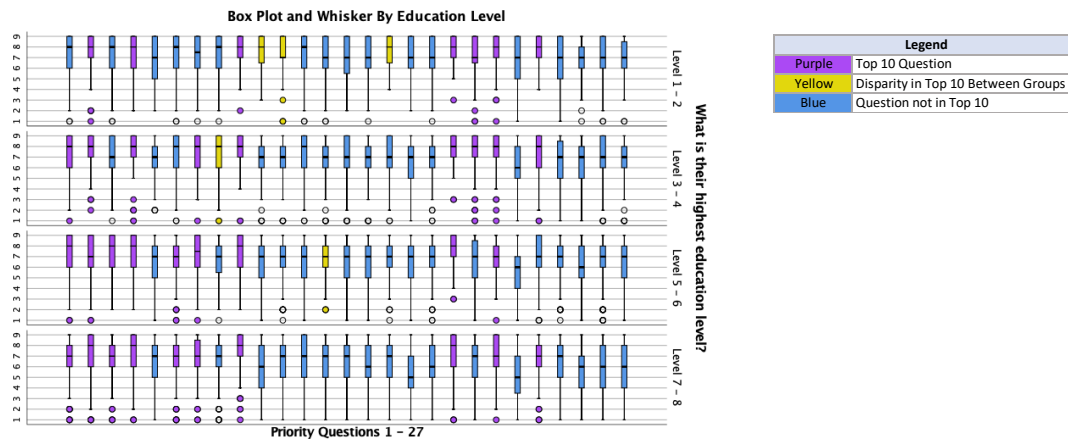

Figure 10. Box Plot and Whisker by Living Arrangements

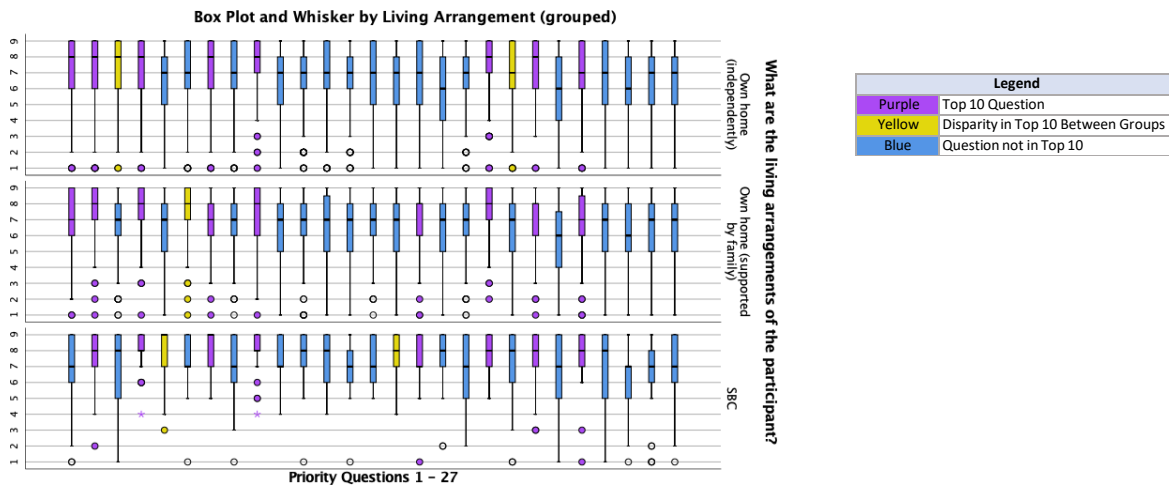

### CENTRE-PD Top 10 Supplementary Material

Figure 11. Box Plot and Whisker of Survey Results by Local Institute

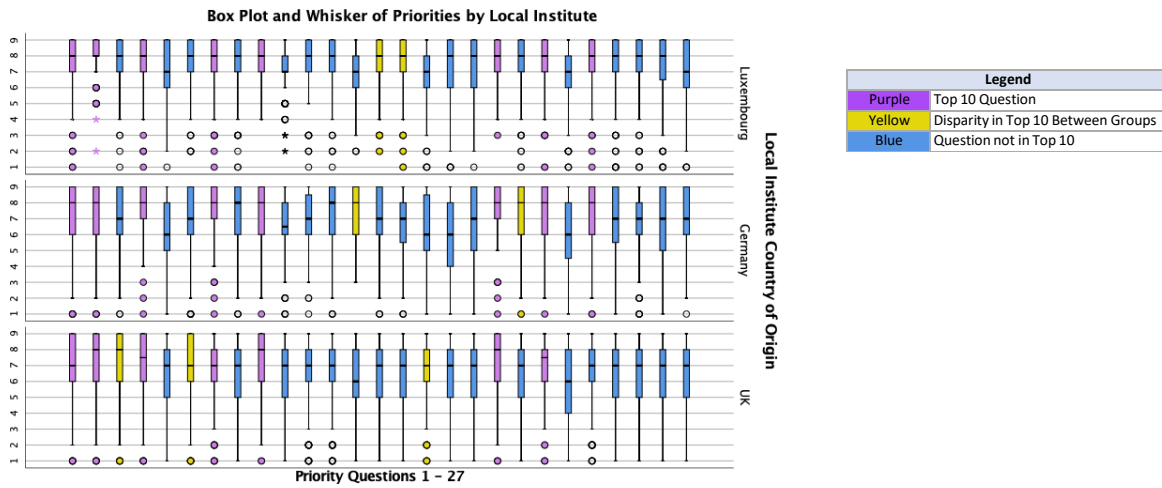

Figure 12. Box Plot and Whisker Comparing Results by Gender

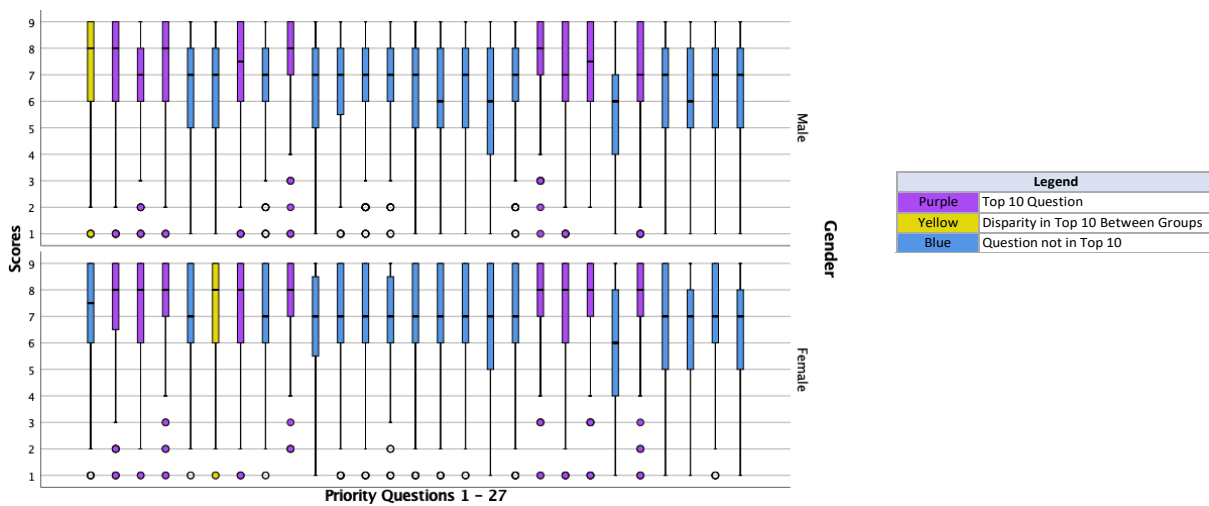

CENTRE-PD Top 10 Supplementary Material

Figure 13. Box Plot and Whisker by Economic Status

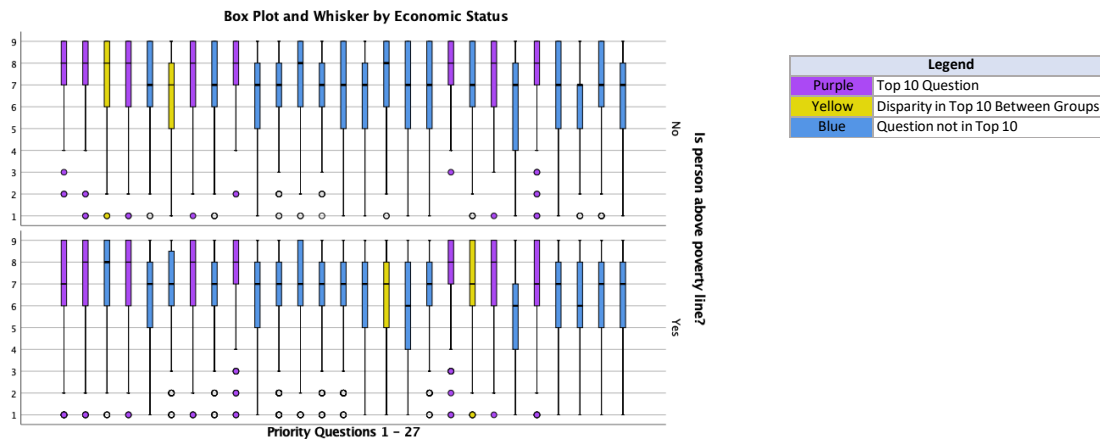

Figure 14. Box Plot and Whisker Comparing Results by Grouped Ethnicity

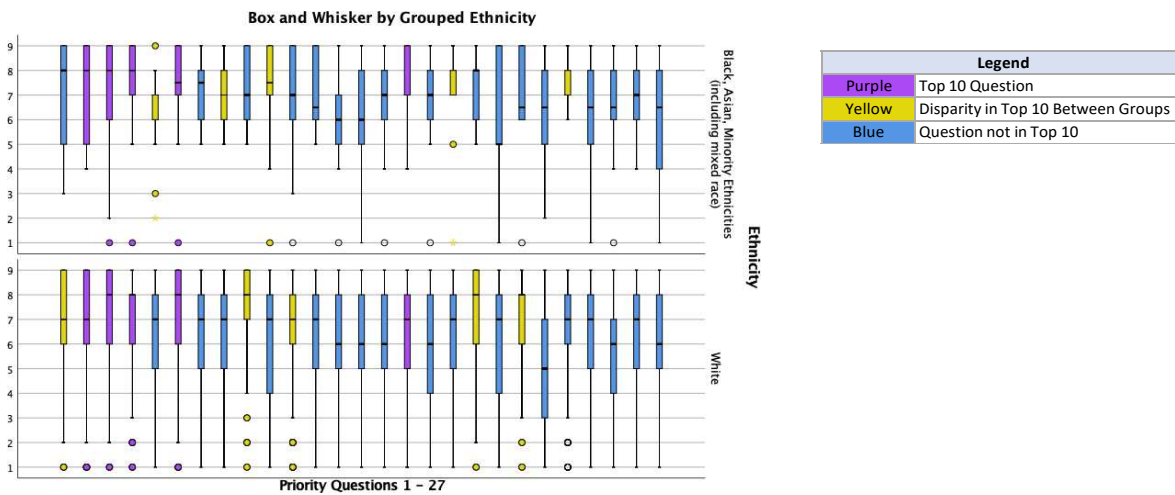

## CENTRE-PD Top 10 Supplementary Material

Top 10 by Sub group

Table 6. Top 10 by PwP and HCP.

| Descriptive Statistics PwP and HCP |                 |         |         |             |      |      |                 |             |
|------------------------------------|-----------------|---------|---------|-------------|------|------|-----------------|-------------|
| HCP (n = 112)                      |                 |         |         |             |      |      |                 |             |
| Rank                               | Question Number | Range   |         | Percentiles |      |      | N who ranked ≥7 | % Agreement |
|                                    |                 | Minimum | Maximum | 25th        | 50th | 75th |                 |             |
| 1                                  | 2               | 4       | 9       | 7           | 8.5  | 9    | 99              | 88          |
| 2                                  | 1               | 1       | 9       | 7           | 8    | 9    | 95              | 85          |
| 3                                  | 7               | 3       | 9       | 7           | 8    | 9    | 95              | 85          |
| 4                                  | 21              | 2       | 9       | 7           | 8    | 9    | 91              | 81          |
| 5                                  | 4               | 1       | 9       | 7           | 8    | 9    | 89              | 79          |
| 6                                  | 14              | 3       | 9       | 7           | 8    | 9    | 88              | 79          |
| 7                                  | 15              | 2       | 9       | 7           | 8    | 9    | 88              | 79          |
| 8                                  | 3               | 1       | 9       | 7           | 7    | 9    | 85              | 76          |
| 9                                  | 9               | 2       | 9       | 6.75        | 8    | 9    | 84              | 75          |
| 9                                  | 23              | 2       | 9       | 6.75        | 8    | 9    | 84              | 75          |
| PWP (n = 511)                      |                 |         |         |             |      |      |                 |             |
| Rank                               | Question Number | Range   |         | Percentiles |      |      | N who ranked ≥7 | % Agreement |
|                                    |                 | Minimum | Maximum | 25th        | 50th | 75th |                 |             |
| 1                                  | 19              | 1       | 9       | 7           | 8    | 9    | 406             | 79          |
| 2                                  | 9               | 1       | 9       | 7           | 8    | 9    | 394             | 77          |
| 3                                  | 2               | 1       | 9       | 6           | 8    | 9    | 373             | 73          |
| 4                                  | 4               | 1       | 9       | 6           | 8    | 9    | 371             | 73          |
| 5                                  | 21              | 1       | 9       | 6           | 8    | 9    | 369             | 72          |
| 6                                  | 7               | 1       | 9       | 6           | 8    | 9    | 358             | 70          |
| 7                                  | 23              | 1       | 9       | 6           | 7    | 9    | 355             | 69          |
| 8                                  | 1               | 1       | 9       | 6           | 8    | 9    | 348             | 68          |
| 9                                  | 3               | 1       | 9       | 6           | 8    | 9    | 346             | 68          |
| 10                                 | 6               | 1       | 9       | 6           | 7    | 9    | 346             | 68          |

## CENTRE-PD Top 10 Supplementary Material

Table 7. Top 10 by Disease Duration Quartiles

| 0-3 years duration (n=146) |          |         |         |             |      |      |                 |             |
|----------------------------|----------|---------|---------|-------------|------|------|-----------------|-------------|
| Rank                       | Question | Range   |         | Percentiles |      |      | N who ranked ≥7 | % Agreement |
|                            |          | Minimum | Maximum | 25th        | 50th | 75th |                 |             |
| 1                          | 9        | 1       | 9       | 7           | 8    | 9    | 118             | 80.8        |
| 2                          | 19       | 1       | 9       | 7           | 8    | 9    | 116             | 79.5        |
| 3                          | 1        | 1       | 9       | 7           | 8    | 9    | 113             | 77.4        |
| 4                          | 7        | 1       | 9       | 7           | 8    | 9    | 112             | 76.7        |
| 5                          | 21       | 2       | 9       | 6           | 8    | 9    | 107             | 73.3        |
| 6                          | 4        | 1       | 9       | 6           | 8    | 9    | 106             | 72.6        |
| 7                          | 2        | 1       | 9       | 6           | 8    | 9    | 103             | 70.5        |
| 8                          | 20       | 1       | 9       | 6           | 7.5  | 9    | 101             | 69.2        |
| 9                          | 23       | 1       | 9       | 6           | 7    | 9    | 101             | 69.2        |
| 10                         | 11       | 1       | 9       | 6           | 7    | 8.75 | 98              | 67.1        |
| 3-5 years duration (n=115) |          |         |         |             |      |      |                 |             |
| Rank                       | Question | Range   |         | Percentiles |      |      | N who ranked ≥7 | % Agreement |
|                            |          | Minimum | Maximum | 25th        | 50th | 75th |                 |             |
| 1                          | 19       | 1       | 9       | 7           | 8    | 9    | 92              | 80.0        |
| 2                          | 9        | 1       | 9       | 6           | 8    | 9    | 85              | 73.9        |
| 3                          | 21       | 1       | 9       | 6           | 8    | 9    | 84              | 73.0        |
| 4                          | 2        | 1       | 9       | 6           | 7    | 9    | 83              | 72.2        |
| 5                          | 20       | 1       | 9       | 6           | 8    | 9    | 81              | 70.4        |
| 6                          | 4        | 1       | 9       | 6           | 8    | 9    | 79              | 68.7        |
| 7                          | 3        | 1       | 9       | 6           | 8    | 8.5  | 78              | 67.8        |
| 8                          | 6        | 1       | 9       | 6           | 7    | 8    | 77              | 67.0        |
| 9                          | 23       | 1       | 9       | 6           | 8    | 9    | 77              | 67.0        |
| 10                         | 7        | 1       | 9       | 6           | 7    | 9    | 75              | 65.2        |
| 5-9 years duration (n=126) |          |         |         |             |      |      |                 |             |
| Rank                       | Question | Range   |         | Percentiles |      |      | N who ranked ≥7 | % Agreement |
|                            |          | Minimum | Maximum | 25th        | 50th | 75th |                 |             |
| 1                          | 2        | 1       | 9       | 7           | 8    | 9    | 95              | 75.4        |
| 1                          | 19       | 3       | 9       | 7           | 8    | 9    | 95              | 75.4        |
| 3                          | 9        | 1       | 9       | 6           | 8    | 9    | 93              | 73.8        |
| 4                          | 3        | 1       | 9       | 6           | 8    | 9    | 92              | 73.0        |
| 5                          | 21       | 1       | 9       | 6           | 8    | 8    | 91              | 72.2        |
| 6                          | 4        | 1       | 9       | 6           | 8    | 9    | 88              | 69.8        |
| 7                          | 23       | 1       | 9       | 6           | 8    | 9    | 88              | 69.8        |
| 8                          | 7        | 1       | 9       | 6           | 8    | 8    | 86              | 68.3        |
| 9                          | 6        | 1       | 9       | 6           | 7.5  | 9    | 86              | 68.3        |
| 10                         | 16       | 1       | 9       | 6           | 7    | 8    | 82              | 65.1        |
| 9+ years duration (n=103)  |          |         |         |             |      |      |                 |             |
| Rank                       | Question | Range   |         | Percentiles |      |      | N who ranked ≥7 | % Agreement |
|                            |          | Minimum | Maximum | 25th        | 50th | 75th |                 |             |
| 1                          | 19       | 3       | 9       | 7           | 8    | 9    | 85              | 82.5        |
| 2                          | 4        | 3       | 9       | 7           | 8    | 9    | 83              | 80.6        |
| 3                          | 9        | 2       | 9       | 7           | 8    | 9    | 82              | 79.6        |
| 4                          | 2        | 1       | 9       | 6           | 8    | 9    | 74              | 71.8        |
| 5                          | 20       | 1       | 9       | 6           | 8    | 9    | 74              | 71.8        |
| 6                          | 23       | 1       | 9       | 6           | 8    | 9    | 73              | 70.9        |
| 7                          | 11       | 1       | 9       | 6           | 7    | 8    | 72              | 69.9        |
| 8                          | 6        | 1       | 9       | 6           | 8    | 8.75 | 71              | 68.9        |
| 9                          | 21       | 1       | 9       | 6           | 7.5  | 9    | 71              | 68.9        |
| 10                         | 7        | 2       | 9       | 6           | 8    | 8    | 70              | 68.0        |

## CENTRE-PD Top 10 Supplementary Material

Table 8. Top 10 by Education Level

| Level 1 - 2 (n=64)  |          |         |         |             |      |      |                 |             |
|---------------------|----------|---------|---------|-------------|------|------|-----------------|-------------|
| Rank                | Question | Range   |         | Percentiles |      |      | N who           | %           |
|                     |          | Minimum | Maximum | 25th        | 50th | 75th |                 |             |
| 1                   | 19       | 3       | 9       | 7           | 8    | 9    | 54              | 84.4        |
| 2                   | 9        | 2       | 9       | 7           | 8    | 9    | 54              | 84.4        |
| 3                   | 21       | 1       | 9       | 7           | 8    | 9    | 54              | 84.4        |
| 4                   | 23       | 4       | 9       | 7           | 8    | 9    | 50              | 78.1        |
| 5                   | 11       | 1       | 9       | 7           | 7    | 9    | 50              | 78.1        |
| 6                   | 2        | 1       | 9       | 7           | 8    | 9    | 49              | 76.6        |
| 7                   | 16       | 4       | 9       | 6.75        | 8    | 9    | 48              | 75.0        |
| 8                   | 10       | 3       | 9       | 6.75        | 8    | 9    | 48              | 75.0        |
| 9                   | 20       | 1       | 9       | 6.75        | 7    | 9    | 48              | 75.0        |
| 10                  | 4        | 2       | 9       | 6           | 8    | 9    | 47              | 73.4        |
| Level 3 - 4 (n=135) |          |         |         |             |      |      |                 |             |
| Rank                | Question | Range   |         | Percentiles |      |      | N who ranked ≥7 | % Agreement |
|                     |          | Minimum | Maximum | 25th        | 50th | 75th |                 |             |
| 1                   | 19       | 3       | 9       | 7           | 8    | 9    | 114             | 84.4        |
| 2                   | 21       | 1       | 9       | 7           | 8    | 9    | 110             | 81.5        |
| 3                   | 2        | 2       | 9       | 7           | 8    | 9    | 103             | 76.3        |
| 4                   | 9        | 1       | 9       | 7           | 8    | 9    | 103             | 76.3        |
| 5                   | 4        | 1       | 9       | 7           | 8    | 9    | 102             | 75.6        |
| 5                   | 20       | 1       | 9       | 7           | 8    | 9    | 102             | 75.6        |
| 7                   | 23       | 1       | 9       | 6           | 8    | 9    | 100             | 74.1        |
| 8                   | 7        | 1       | 9       | 6           | 8    | 9    | 99              | 73.3        |
| 9                   | 8        | 1       | 9       | 6           | 8    | 9    | 98              | 72.6        |
| 10                  | 1        | 1       | 9       | 6           | 8    | 9    | 97              | 71.9        |
| Level 5 - 6 (n=128) |          |         |         |             |      |      |                 |             |
| Rank                | Question | Range   |         | Percentiles |      |      | N who ranked ≥7 | % Agreement |
|                     |          | Minimum | Maximum | 25th        | 50th | 75th |                 |             |
| 1                   | 19       | 3       | 9       | 7           | 8    | 9    | 100             | 78.1        |
| 2                   | 9        | 2       | 9       | 6           | 8    | 9    | 94              | 73.4        |
| 3                   | 3        | 2       | 9       | 6           | 8    | 9    | 93              | 72.7        |
| 4                   | 4        | 2       | 9       | 6           | 8    | 9    | 92              | 71.9        |
| 5                   | 2        | 1       | 9       | 6           | 7    | 9    | 92              | 71.9        |
| 6                   | 7        | 1       | 9       | 6           | 7.5  | 9    | 90              | 70.3        |
| 7                   | 1        | 1       | 9       | 6           | 8    | 9    | 84              | 65.6        |
| 8                   | 6        | 1       | 9       | 6           | 7    | 8    | 84              | 65.6        |
| 9                   | 21       | 1       | 9       | 6           | 7    | 8    | 82              | 64.1        |
| 10                  | 13       | 2       | 9       | 6           | 7    | 8    | 80              | 62.5        |
| Level 7 - 8 (n=155) |          |         |         |             |      |      |                 |             |
| Rank                | Question | Range   |         | Percentiles |      |      | N who ranked ≥7 | % Agreement |
|                     |          | Minimum | Maximum | 25th        | 50th | 75th |                 |             |
| 1                   | 9        | 1       | 9       | 7           | 8    | 9    | 120             | 77.4        |
| 2                   | 19       | 1       | 9       | 6           | 8    | 9    | 113             | 72.9        |
| 3                   | 4        | 1       | 9       | 6           | 8    | 9    | 106             | 68.4        |
| 4                   | 21       | 1       | 9       | 6           | 7    | 9    | 104             | 67.1        |
| 5                   | 2        | 1       | 9       | 6           | 8    | 9    | 103             | 66.5        |
| 6                   | 23       | 1       | 9       | 6           | 7    | 8    | 103             | 66.5        |
| 7                   | 1        | 1       | 9       | 6           | 7    | 8    | 101             | 65.2        |
| 8                   | 7        | 1       | 9       | 6           | 7    | 8.5  | 100             | 64.5        |
| 9                   | 3        | 1       | 9       | 6           | 7    | 8    | 97              | 62.6        |
| 10                  | 6        | 1       | 9       | 6           | 7    | 8    | 96              | 61.9        |



## CENTRE-PD Top 10 Supplementary Material

Table 9. Top 10 by Living Arrangements

| Living at Home Independently (n=331)       |          |         |         |            |      |      |                 |             |
|--------------------------------------------|----------|---------|---------|------------|------|------|-----------------|-------------|
| Rank                                       | Question | Range   |         | Percentile |      |      | N who ranked ≥7 | % Agreement |
|                                            |          | Minimum | Maximum | 25th       | 50th | 75th |                 |             |
| 1                                          | 19       | 1       | 9       | 7          | 8    | 9    | 261             | 78.9        |
| 2                                          | 9        | 1       | 9       | 7          | 8    | 9    | 259             | 78.2        |
| 3                                          | 21       | 1       | 9       | 6          | 8    | 9    | 247             | 74.6        |
| 4                                          | 3        | 1       | 9       | 6          | 8    | 9    | 236             | 71.3        |
| 5                                          | 4        | 1       | 9       | 6          | 8    | 9    | 235             | 71.0        |
| 6                                          | 1        | 1       | 9       | 6          | 8    | 9    | 231             | 69.8        |
| 6                                          | 2        | 1       | 9       | 6          | 8    | 9    | 231             | 69.8        |
| 8                                          | 7        | 1       | 9       | 6          | 8    | 9    | 229             | 69.2        |
| 9                                          | 23       | 1       | 9       | 6          | 7    | 9    | 228             | 68.9        |
| 10                                         | 20       | 1       | 9       | 6          | 7    | 9    | 223             | 67.4        |
| Living at Home Supported by Family (n=123) |          |         |         |            |      |      |                 |             |
| Rank                                       | Question | Range   |         | Percentile |      |      | N who ranked ≥7 | % Agreement |
|                                            |          | Minimum | Maximum | 25th       | 50th | 75th |                 |             |
| 1                                          | 19       | 2       | 9       | 7          | 8    | 9    | 96              | 78.0        |
| 2                                          | 6        | 1       | 9       | 7          | 8    | 9    | 95              | 77.2        |
| 3                                          | 2        | 1       | 9       | 7          | 8    | 9    | 94              | 76.4        |
| 4                                          | 4        | 1       | 9       | 7          | 8    | 9    | 93              | 75.6        |
| 5                                          | 9        | 1       | 9       | 6          | 8    | 9    | 89              | 72.4        |
| 6                                          | 16       | 1       | 9       | 6          | 8    | 8    | 86              | 69.9        |
| 7                                          | 1        | 1       | 9       | 6          | 7    | 9    | 84              | 68.3        |
| 8                                          | 23       | 1       | 9       | 6          | 7    | 8.5  | 84              | 68.3        |
| 9                                          | 7        | 1       | 9       | 6          | 7    | 8    | 82              | 66.7        |
| 10                                         | 21       | 1       | 9       | 6          | 8    | 8    | 80              | 65.0        |
| Needing Carers or in Supported Home (n=25) |          |         |         |            |      |      |                 |             |
| Rank                                       | Question | Range   |         | Percentile |      |      | N who ranked ≥7 | % Agreement |
|                                            |          | Minimum | Maximum | 25th       | 50th | 75th |                 |             |
| 1                                          | 19       | 5       | 9       | 7          | 8    | 9    | 23              | 92.0        |
| 2                                          | 2        | 2       | 9       | 7          | 8    | 9    | 23              | 92.0        |
| 3                                          | 7        | 5       | 9       | 7          | 9    | 9    | 22              | 88.0        |
| 4                                          | 5        | 3       | 9       | 7          | 9    | 9    | 21              | 84.0        |
| 5                                          | 9        | 4       | 9       | 8          | 8    | 9    | 21              | 84.0        |
| 6                                          | 23       | 1       | 9       | 7          | 8    | 9    | 21              | 84.0        |
| 7                                          | 16       | 1       | 9       | 7          | 7    | 9    | 21              | 84.0        |
| 8                                          | 4        | 4       | 9       | 8          | 8    | 9    | 20              | 80.0        |
| 9                                          | 15       | 4       | 9       | 7          | 8    | 9    | 20              | 80.0        |

## CENTRE-PD Top 10 Supplementary Material

Table 10. Top 10 by Local Institute

| UL Summary (n=303)   |          |         |         |            |      |      |                 |             |
|----------------------|----------|---------|---------|------------|------|------|-----------------|-------------|
| Rank                 | Question | Range   |         | Percentile |      |      | N who ranked ≥7 | % Agreement |
|                      |          | Minimum | Maximum | 25th       | 50th | 75th |                 |             |
| 1                    | 2        | 2       | 9       | 8          | 8    | 9    | 275             | 90.8        |
| 2                    | 9        | 4       | 9       | 7          | 8    | 9    | 268             | 88.4        |
| 3                    | 1        | 1       | 9       | 7          | 8    | 9    | 266             | 87.8        |
| 4                    | 4        | 1       | 9       | 7          | 8    | 9    | 263             | 86.8        |
| 5                    | 7        | 1       | 9       | 7          | 8    | 9    | 258             | 85.1        |
| 6                    | 19       | 3       | 9       | 7          | 8    | 9    | 257             | 84.8        |
| 7                    | 21       | 1       | 9       | 7          | 8    | 9    | 253             | 83.5        |
| 7                    | 23       | 1       | 9       | 7          | 8    | 9    | 253             | 83.5        |
| 9                    | 15       | 1       | 9       | 7          | 8    | 9    | 250             | 82.5        |
| 10                   | 14       | 2       | 9       | 7          | 8    | 9    | 247             | 81.5        |
| EKUT Summary (n=176) |          |         |         |            |      |      |                 |             |
| Rank                 | Question | Range   |         | Percentile |      |      | N who ranked ≥7 | % Agreement |
|                      |          | Minimum | Maximum | 25th       | 50th | 75th |                 |             |
| 1                    | 19       | 1       | 9       | 7          | 8    | 9    | 141             | 80.1        |
| 2                    | 4        | 1       | 9       | 7          | 8    | 9    | 134             | 76.1        |
| 3                    | 7        | 1       | 9       | 7          | 8    | 9    | 133             | 75.6        |
| 4                    | 9        | 1       | 9       | 6          | 8    | 9    | 130             | 73.9        |
| 5                    | 21       | 1       | 9       | 6          | 8    | 9    | 127             | 72.2        |
| 5                    | 23       | 1       | 9       | 6          | 8    | 9    | 127             | 72.2        |
| 7                    | 20       | 1       | 9       | 6          | 8    | 9    | 126             | 71.6        |
| 8                    | 2        | 1       | 9       | 6          | 8    | 9    | 124             | 70.5        |
| 9                    | 13       | 2       | 9       | 6          | 8    | 9    | 122             | 69.3        |
| 10                   | 1        | 1       | 9       | 6          | 8    | 9    | 114             | 64.8        |
| UOXF Summary (n=400) |          |         |         |            |      |      |                 |             |
| Rank                 | Question | Range   |         | Percentile |      |      | N who ranked ≥7 | % Agreement |
|                      |          | Minimum | Maximum | 25th       | 50th | 75th |                 |             |
| 1                    | 19       | 1       | 9       | 6          | 8    | 9    | 297             | 74.3        |
| 1                    | 9        | 1       | 9       | 6          | 8    | 9    | 297             | 74.3        |
| 3                    | 21       | 1       | 9       | 6          | 7.5  | 8    | 293             | 73.3        |
| 4                    | 2        | 1       | 9       | 6          | 8    | 9    | 291             | 72.8        |
| 5                    | 3        | 1       | 9       | 6          | 8    | 9    | 274             | 68.5        |
| 6                    | 6        | 1       | 9       | 6          | 7    | 9    | 274             | 68.5        |
| 7                    | 7        | 1       | 9       | 6          | 7    | 8    | 271             | 67.8        |
| 8                    | 4        | 1       | 9       | 6          | 7.5  | 9    | 270             | 67.5        |
| 9                    | 16       | 1       | 9       | 6          | 7    | 8    | 268             | 67.0        |
| 10                   | 1        | 1       | 9       | 6          | 7    | 9    | 265             | 66.3        |

## CENTRE-PD Top 10 Supplementary Material

Table 11. Top 10 Priorities by Gender

| Male (n=312) |                 |         |         |             |               |      |                 |             |
|--------------|-----------------|---------|---------|-------------|---------------|------|-----------------|-------------|
| Rank         | Question Number | Range   |         | Percentiles |               |      | N who ranked ≥7 | % Agreement |
|              |                 | Minimum | Maximum | 25th        | 50th (Median) | 75th |                 |             |
| 1            | 19              | 1       | 9       | 7           | 8             | 9    | 246             | 78.8        |
| 2            | 9               | 1       | 9       | 7           | 8             | 9    | 236             | 75.6        |
| 3            | 2               | 1       | 9       | 6           | 8             | 9    | 224             | 71.8        |
| 4            | 1               | 1       | 9       | 6           | 8             | 9    | 218             | 69.9        |
| 5            | 4               | 1       | 9       | 6           | 8             | 9    | 217             | 69.6        |
| 6            | 7               | 1       | 9       | 6           | 7.5           | 9    | 216             | 69.2        |
| 7            | 21              | 1       | 9       | 6           | 7.5           | 9    | 212             | 67.9        |
| 8            | 3               | 1       | 9       | 6           | 7             | 8    | 207             | 66.3        |
| 9            | 23              | 1       | 9       | 6           | 7             | 9    | 204             | 65.4        |
| 10           | 20              | 1       | 9       | 6           | 7             | 9    | 203             | 65.1        |

  

| Female (n=192) |                 |         |         |             |               |      |                 |             |
|----------------|-----------------|---------|---------|-------------|---------------|------|-----------------|-------------|
| Rank           | Question Number | Range   |         | Percentiles |               |      | N who ranked ≥7 | % Agreement |
|                |                 | Minimum | Maximum | 25th        | 50th (Median) | 75th |                 |             |
| 1              | 19              | 1       | 9       | 7           | 8             | 9    | 156             | 81.3        |
| 2              | 9               | 1       | 9       | 7           | 8             | 9    | 153             | 79.7        |
| 3              | 21              | 1       | 9       | 7           | 8             | 9    | 151             | 78.6        |
| 4              | 23              | 1       | 9       | 7           | 8             | 9    | 148             | 77.1        |
| 5              | 4               | 1       | 9       | 7           | 8             | 9    | 147             | 76.6        |
| 6              | 2               | 1       | 9       | 6.75        | 8             | 9    | 144             | 75.0        |
| 7              | 6               | 1       | 9       | 6           | 8             | 9    | 143             | 74.5        |
| 8              | 7               | 1       | 9       | 6           | 8             | 9    | 137             | 71.4        |
| 9              | 3               | 1       | 9       | 6           | 8             | 9    | 134             | 69.8        |
| 10             | 20              | 1       | 9       | 6           | 8             | 9    | 134             | 69.8        |

## CENTRE-PD Top 10 Supplementary Material

Table 12. Top 10 by Economic Status

| Above Poverty Line (n=372) |          |         |         |            |      |      |                 |             |
|----------------------------|----------|---------|---------|------------|------|------|-----------------|-------------|
| Rank                       | Question | Range   |         | Percentile |      |      | N who ranked ≥7 | % Agreement |
|                            |          | Minimum | Maximum | 25th       | 50th | 75th |                 |             |
| 1                          | 19       | 1       | 9       | 7          | 8    | 9    | 291             | 78.2        |
| 2                          | 9        | 1       | 9       | 7          | 8    | 9    | 287             | 77.2        |
| 3                          | 4        | 1       | 9       | 6          | 8    | 9    | 272             | 73.1        |
| 4                          | 21       | 1       | 9       | 6          | 8    | 9    | 268             | 72.0        |
| 5                          | 2        | 1       | 9       | 6          | 8    | 9    | 263             | 70.7        |
| 6                          | 3        | 1       | 9       | 6          | 8    | 9    | 255             | 68.5        |
| 6                          | 7        | 1       | 9       | 6          | 8    | 9    | 255             | 68.5        |
| 8                          | 6        | 1       | 9       | 6          | 7    | 8.25 | 252             | 67.7        |
| 9                          | 23       | 1       | 9       | 6          | 7    | 9    | 248             | 66.7        |
| 10                         | 1        | 1       | 9       | 6          | 7    | 9    | 247             | 66.4        |

  

| Below Poverty Line (n=73) |          |         |         |            |      |      |                 |             |
|---------------------------|----------|---------|---------|------------|------|------|-----------------|-------------|
| Rank                      | Question | Range   |         | Percentile |      |      | N who ranked ≥7 | % Agreement |
|                           |          | Minimum | Maximum | 25th       | 50th | 75th |                 |             |
| 1                         | 19       | 3       | 9       | 7          | 8    | 9    | 65              | 89.0        |
| 2                         | 2        | 1       | 9       | 7          | 8    | 9    | 60              | 82.2        |
| 3                         | 9        | 2       | 9       | 7          | 8    | 9    | 58              | 79.5        |
| 4                         | 1        | 2       | 9       | 7          | 8    | 9    | 55              | 75.3        |
| 5                         | 23       | 1       | 9       | 7          | 8    | 9    | 55              | 75.3        |
| 6                         | 7        | 1       | 9       | 6          | 8    | 9    | 53              | 72.6        |
| 6                         | 21       | 1       | 9       | 6          | 8    | 9    | 53              | 72.6        |
| 8                         | 20       | 1       | 9       | 6          | 7    | 9    | 53              | 72.6        |
| 9                         | 16       | 1       | 9       | 6          | 8    | 9    | 52              | 71.2        |
| 10                        | 4        | 1       | 9       | 6          | 8    | 9    | 51              | 69.9        |

Table 13. Top 10 by Ethnicity Groups

| BAME (n=11) |          |         |         |             |      |      |                 |             |
|-------------|----------|---------|---------|-------------|------|------|-----------------|-------------|
| Rank        | Question | Range   |         | Percentiles |      |      | N who ranked ≥7 | % Agreement |
|             |          | Minimum | Maximum | 25th        | 50th | 75th |                 |             |
| 1           | 6        | 1       | 9       | 5           | 8    | 9    | 10              | 90.9        |
| 2           | 4        | 1       | 9       | 5           | 8    | 9    | 9               | 81.8        |
| 3           | 18       | 1       | 9       | 5           | 8    | 9    | 9               | 81.8        |
| 4           | 3        | 1       | 9       | 5           | 8    | 9    | 8               | 72.7        |
| 5           | 5        | 3       | 9       | 5           | 8    | 9    | 8               | 72.7        |
| 6           | 10       | 1       | 9       | 5           | 8    | 9    | 8               | 72.7        |
| 7           | 16       | 4       | 9       | 5           | 8    | 9    | 8               | 72.7        |
| 8           | 23       | 6       | 9       | 5           | 8    | 9    | 8               | 72.7        |
| 9           | 2        | 4       | 9       | 5           | 8    | 9    | 7               | 63.6        |
| 10          | 8        | 5       | 9       | 5           | 8    | 9    | 7               | 63.6        |

  

| White (n=217) |          |         |         |             |      |      |                 |             |
|---------------|----------|---------|---------|-------------|------|------|-----------------|-------------|
| Rank          | Question | Range   |         | Percentiles |      |      | N who ranked ≥7 | % Agreement |
|               |          | Minimum | Maximum | 25th        | 50th | 75th |                 |             |
| 1             | 9        | 1       | 9       | 7           | 8    | 9    | 163             | 75.1        |
| 2             | 19       | 1       | 9       | 6           | 8    | 9    | 162             | 74.7        |
| 3             | 21       | 1       | 9       | 6           | 8    | 8    | 153             | 70.5        |
| 4             | 6        | 1       | 9       | 6           | 8    | 9    | 152             | 70.0        |
| 5             | 2        | 1       | 9       | 6           | 7    | 9    | 149             | 68.7        |
| 6             | 3        | 1       | 9       | 6           | 8    | 9    | 146             | 67.3        |
| 7             | 4        | 1       | 9       | 6           | 8    | 8    | 141             | 65.0        |
| 8             | 1        | 1       | 9       | 6           | 7    | 9    | 140             | 64.5        |
| 9             | 16       | 1       | 9       | 5           | 7    | 8    | 137             | 63.1        |
| 10            | 11       | 1       | 9       | 6           | 7    | 8    | 133             | 61.3        |

## CENTRE-PD Top 10 Supplementary Material

## Kappa Tables

Table 14. Kappa Agreement between Disease Duration Groups

| Symmetric Measures     |             |                                    |                        |                          |
|------------------------|-------------|------------------------------------|------------------------|--------------------------|
| Comparison             | Kappa Value | Asymptotic Standard Error <i>a</i> | Approximate T <i>b</i> | Approximate Significance |
| 0-3 years vs 3-5 years | 0.682       | 0.146                              | 3.546                  | 0.000                    |
| 0-3 years v 5-9 years  | 0.524       | 0.170                              | 2.720                  | 0.007                    |
| 0-3 years v 9+ years   | 0.841       | 0.108                              | 4.371                  | 0.000                    |
| 3-5 years v 5-9 years  | 0.841       | 0.108                              | 4.371                  | 0.000                    |
| 3-5 years v 9+ years   | 0.841       | 0.108                              | 4.371                  | 0.000                    |
| 5-9 years v 9+ years   | 0.682       | 0.146                              | 3.546                  | 0.000                    |

*a* Not assuming the null hypothesis.  
*b* Using the asymptotic standard error assuming the null hypothesis.

Table 15. Kappa Agreement between Education Levels

| Symmetric Measures         |       |                                    |                        |                          |
|----------------------------|-------|------------------------------------|------------------------|--------------------------|
| Comparison                 | Kappa | Asymptotic Standard Error <i>a</i> | Approximate T <i>b</i> | Approximate Significance |
| Level 1 - 2 vs Level 3 - 4 | 0.524 | 0.170                              | 2.720                  | 0.007                    |
| Level 1 - 2 vs Level 5 - 6 | 0.206 | 0.192                              | 1.070                  | 0.285                    |
| Level 1 - 2 vs Level 7 - 8 | 0.365 | 0.185                              | 1.895                  | 0.058                    |
| Level 3 - 4 vs Level 5 - 6 | 0.524 | 0.170                              | 2.720                  | 0.007                    |
| Level 3 - 4 vs Level 7 - 8 | 0.682 | 0.146                              | 3.546                  | 0.000                    |
| Level 5 - 6 vs Level 7 - 8 | 0.841 | 0.108                              | 4.371                  | 0.000                    |

*a* Not assuming the null hypothesis.  
*b* Using the asymptotic standard error assuming the null hypothesis.

Table 16. Kappa test of Agreement by Living Arrangement (grouped)

| Symmetric Measures                           |       |                                    |                        |                          |
|----------------------------------------------|-------|------------------------------------|------------------------|--------------------------|
| Comparison                                   | Kappa | Asymptotic Standard Error <i>a</i> | Approximate T <i>b</i> | Approximate Significance |
| Independently vs Supported by Family         | 0.682 | 0.146                              | 3.546                  | 0.000                    |
| Independently vs Carers/Supported Home       | 0.524 | 0.170                              | 2.720                  | 0.007                    |
| Supported by Family vs Carers/Supported Home | 0.682 | 0.146                              | 3.546                  | 0.000                    |
| N of Valid Cases                             | 27    |                                    |                        |                          |

*a* Not assuming the null hypothesis.  
*b* Using the asymptotic standard error assuming the null hypothesis.

Table 17. Kappa Test for Agreement between Local Institutes

| Measure of Agreement |       |                                    |                        |                          |
|----------------------|-------|------------------------------------|------------------------|--------------------------|
| Comparison           | Kappa | Asymptotic Standard Error <i>a</i> | Approximate T <i>b</i> | Approximate Significance |
| UL * EKUT            | 0.682 | 0.146                              | 3.546                  | 0                        |
| UL * UOXF            | 0.524 | 0.17                               | 2.72                   | 0.007                    |
| EKUT * UOXF          | 0.524 | 0.17                               | 2.72                   | 0.007                    |

*a* Not assuming the null hypothesis.  
*b* Using the asymptotic standard error assuming the null hypothesis.

## CENTRE-PD Top 10 Supplementary Material

Table 18. Kappa for Gender

|                      |       | Symmetric Measures |                                        |                            |                          |
|----------------------|-------|--------------------|----------------------------------------|----------------------------|--------------------------|
|                      |       | Value              | Asymptotic Standard Error <sup>a</sup> | Approximate T <sup>b</sup> | Approximate Significance |
| Measure of Agreement | Kappa | .841               | .108                                   | 4.371                      | .000                     |
| N of Valid Cases     |       | 27                 |                                        |                            |                          |

a. Not assuming the null hypothesis.

b. Using the asymptotic standard error assuming the null hypothesis.

Table 19. Kappa for Economic Status

|                      |       | Symmetric Measures |                                        |                            |                          |
|----------------------|-------|--------------------|----------------------------------------|----------------------------|--------------------------|
|                      |       | Value              | Asymptotic Standard Error <sup>a</sup> | Approximate T <sup>b</sup> | Approximate Significance |
| Measure of Agreement | Kappa | .682               | .146                                   | 3.546                      | .000                     |
| N of Valid Cases     |       | 27                 |                                        |                            |                          |

a. Not assuming the null hypothesis.

b. Using the asymptotic standard error assuming the null hypothesis.

Table 20. Kappa test between HCP and PWP

|                      |       | Symmetric Measures |                                        |                            |                          |
|----------------------|-------|--------------------|----------------------------------------|----------------------------|--------------------------|
|                      |       | Value              | Asymptotic Standard Error <sup>a</sup> | Approximate T <sup>b</sup> | Approximate Significance |
| Measure of Agreement | Kappa | .682               | .146                                   | 3.546                      | .000                     |
| N of Valid Cases     |       | 27                 |                                        |                            |                          |

a. Not assuming the null hypothesis.

b. Using the asymptotic standard error assuming the null hypothesis.

Table 21. Kappa test with Deane et al Top 10 by Focus group

|                      |       | Symmetric Measures |                                        |                            |                          |
|----------------------|-------|--------------------|----------------------------------------|----------------------------|--------------------------|
|                      |       | Value              | Asymptotic Standard Error <sup>a</sup> | Approximate T <sup>b</sup> | Approximate Significance |
| Measure of Agreement | Kappa | .206               | .192                                   | 1.070                      | .285                     |
| N of Valid Cases     |       | 27                 |                                        |                            |                          |

a. Not assuming the null hypothesis.

b. Using the asymptotic standard error assuming the null hypothesis.

## CENTRE-PD Top 10 Supplementary Material

Table 22. Kappa test with Deane et al by interim ranking

| <b>Symmetric Measures</b> |       |       |                                        |                            |                          |
|---------------------------|-------|-------|----------------------------------------|----------------------------|--------------------------|
|                           |       | Value | Asymptotic Standard Error <sup>a</sup> | Approximate T <sup>b</sup> | Approximate Significance |
| Measure of Agreement      | Kappa | .524  | .170                                   | 2.720                      | .007                     |
| N of Valid Cases          |       | 27    |                                        |                            |                          |

a. Not assuming the null hypothesis.

b. Using the asymptotic standard error assuming the null hypothesis.

## CENTRE-PD Top 10 Supplementary Material

## Distribution Analyses

Table 23. Distribution Comparisons of each question by subgroup

| Question Number | Question                                                                                                                                                             | Significance (p-value) |                       |                      |                          |                      |              |                       |
|-----------------|----------------------------------------------------------------------------------------------------------------------------------------------------------------------|------------------------|-----------------------|----------------------|--------------------------|----------------------|--------------|-----------------------|
|                 |                                                                                                                                                                      | HCP vs PwP (MWW)       | Disease Duration (KW) | Education Level (KW) | Living Arrangements (KW) | Local Institute (KW) | Gender (MWW) | Economic Status (MWW) |
| 1               | What treatments are helpful in reducing tremor in people with Parkinson's?                                                                                           | 0.001                  | 0.305                 | 0.027                | 0.591                    | 0.000                | 0.960        | 0.113                 |
| 2               | What treatments are helpful for reducing balance problems and falls in people with Parkinson's?                                                                      | 0.000                  | 0.995                 | 0.043                | 0.088                    | 0.000                | 0.120        | 0.268                 |
| 3               | Is it possible to identify different types of Parkinson's, e.g., tremor dominant? And can we tailor treatments best according to these different types?              | 0.794                  | 0.087                 | 0.403                | 0.321                    | 0.079                | 0.027        | 0.888                 |
| 4               | What treatments would ensure the medications were equally effective each day (prevented/managed wearing off, variability, on/off states) in people with Parkinson's? | 0.275                  | 0.040                 | 0.752                | 0.186                    | 0.000                | 0.023        | 0.907                 |
| 5               | Would the monitoring of dopamine levels in the body (e.g., with blood tests) be helpful in determining medication timing and amount (dose)?                          | 0.084                  | 0.156                 | 0.161                | 0.001                    | 0.000                | 0.022        | 0.043                 |
| 6               | What is helpful for improving the quality of sleep in people with Parkinson's?                                                                                       | 0.703                  | 0.987                 | 0.009                | 0.212                    | 0.035                | 0.001        | 0.154                 |



## CENTRE-PD Top 10 Supplementary Material

|           |                                                                                                                                                       |       |       |       |       |       |       |       |
|-----------|-------------------------------------------------------------------------------------------------------------------------------------------------------|-------|-------|-------|-------|-------|-------|-------|
| <b>7</b>  | What best treats mild cognitive problems such as memory loss, lack of concentration, indecision and slowed thinking in people with Parkinson's?       | 0.091 | 0.300 | 0.502 | 0.012 | 0.000 | 0.174 | 0.499 |
| <b>8</b>  | What treatments are helpful in reducing urinary problems (urgency, irritable bladder, incontinence) in people with Parkinson's?                       | 0.592 | 0.953 | 0.011 | 0.825 | 0.000 | 0.413 | 0.950 |
| <b>9</b>  | What drug treatments are best for the different stages of Parkinson's?                                                                                | 0.248 | 0.728 | 0.529 | 0.059 | 0.001 | 0.201 | 0.756 |
| <b>10</b> | What approaches are helpful for reducing stress and anxiety in people with Parkinson's?                                                               | 0.008 | 0.387 | 0.000 | 0.097 | 0.000 | 0.008 | 0.288 |
| <b>11</b> | What treatments are helpful for reducing dyskinesias (involuntary movements, which are a side effect of some medications) in people with Parkinson's? | 0.015 | 0.653 | 0.004 | 0.079 | 0.000 | 0.001 | 0.426 |
| <b>12</b> | What best treats dementia in people with Parkinson's?                                                                                                 | 0.041 | 0.103 | 0.027 | 0.249 | 0.000 | 0.106 | 0.122 |
| <b>13</b> | What interventions are effective for reducing or managing unexplained fatigue in people with Parkinson's?                                             | 0.285 | 0.502 | 0.180 | 0.356 | 0.000 | 0.887 | 0.932 |
| <b>14</b> | What best helps prevent or reduce freezing (of gait and in general) in people with Parkinson's?                                                       | 0.002 | 0.411 | 0.067 | 0.402 | 0.000 | 0.049 | 0.322 |

## CENTRE-PD Top 10 Supplementary Material

|           |                                                                                                                                                                                                  |       |       |       |       |       |       |       |
|-----------|--------------------------------------------------------------------------------------------------------------------------------------------------------------------------------------------------|-------|-------|-------|-------|-------|-------|-------|
| <b>15</b> | What treatments are helpful for swallowing problems (dysphagia) in people with Parkinson's?                                                                                                      | 0.000 | 0.331 | 0.009 | 0.043 | 0.000 | 0.014 | 0.934 |
| <b>16</b> | What is the best method of monitoring a person with Parkinson's response to treatments?                                                                                                          | 0.602 | 0.629 | 0.000 | 0.053 | 0.004 | 0.189 | 0.034 |
| <b>17</b> | What training, techniques or aids are needed for hospital staff, to make sure patients with Parkinson's get their medications correctly and on time?                                             | 0.007 | 0.603 | 0.000 | 0.002 | 0.000 | 0.001 | 0.090 |
| <b>18</b> | What treatments are helpful in reducing bowel problems (constipation, incontinence) in people with Parkinson's?                                                                                  | 0.224 | 0.650 | 0.000 | 0.468 | 0.000 | 0.125 | 0.411 |
| <b>19</b> | What is the best type and dose of exercise (physiotherapy) for improving muscle strength, flexibility, fitness, balance and function in people with Parkinson's?                                 | 0.072 | 0.439 | 0.026 | 0.439 | 0.000 | 0.166 | 0.687 |
| <b>20</b> | Can medications be developed to allow fewer doses per day for people with Parkinson's? (For example combinations of medications in one pill, slow release pills)                                 | 0.347 | 0.106 | 0.000 | 0.071 | 0.000 | 0.221 | 0.273 |
| <b>21</b> | What helps improve the dexterity (fine motor skills or coordination of small muscle movements) of people with Parkinson's so they can do up buttons, use computers, phones, remote controls etc? | 0.337 | 0.739 | 0.009 | 0.066 | 0.004 | 0.005 | 0.540 |
| <b>22</b> | What treatments are effective in reducing hallucinations (including vivid dreams) in people with Parkinson's?                                                                                    | 0.000 | 0.170 | 0.000 | 0.322 | 0.000 | 0.225 | 0.379 |

## CENTRE-PD Top 10 Supplementary Material

|           |                                                                                                                                                                                             |       |       |       |       |       |       |       |
|-----------|---------------------------------------------------------------------------------------------------------------------------------------------------------------------------------------------|-------|-------|-------|-------|-------|-------|-------|
| <b>23</b> | What is the best treatment for stiffness (rigidity) in people with Parkinson's?                                                                                                             | 0.185 | 0.680 | 0.033 | 0.137 | 0.000 | 0.016 | 0.083 |
| <b>24</b> | At which stage of Parkinson's is deep brain stimulation (a surgical treatment that involves implanting a 'brain pacemaker' that sends signals to specific parts of the brain) most helpful? | 0.423 | 0.691 | 0.383 | 0.090 | 0.000 | 0.853 | 0.152 |
| <b>25</b> | What training to improve knowledge and skills do informal carers (family and friends) need in order to best care for people with Parkinson's?                                               | 0.000 | 0.417 | 0.000 | 0.884 | 0.000 | 0.297 | 0.467 |
| <b>26</b> | What is the best treatment for pain in people with Parkinson's?                                                                                                                             | 0.020 | 0.258 | 0.002 | 0.827 | 0.000 | 0.001 | 0.116 |
| <b>27</b> | What speech therapy techniques are helpful for communication problems in people with Parkinson's?                                                                                           | 0.001 | 0.731 | 0.001 | 0.337 | 0.000 | 0.421 | 0.813 |

## CENTRE-PD Top 10 Supplementary Material

Table 24. Pairwise comparison of significant KW Disease Duration for Question 4.

**Pairwise Comparisons of Duration of Disease**

| Sample 1-Sample 2       | Test Statistic | Std. Error | Std. Test Statistic | Sig. | Adj. Sig. <sup>a</sup> |
|-------------------------|----------------|------------|---------------------|------|------------------------|
| 0 - 3 years-5 - 9 years | -1.548         | 16.698     | -.093               | .926 | 1.000                  |
| 0 - 3 years-3 - 5 years | -19.389        | 17.121     | -1.132              | .257 | 1.000                  |
| 0 - 3 years-9+ years    | -46.026        | 17.671     | -2.605              | .009 | .055                   |
| 5 - 9 years-3 - 5 years | 17.841         | 17.710     | 1.007               | .314 | 1.000                  |
| 5 - 9 years-9+ years    | -44.478        | 18.241     | -2.438              | .015 | .089                   |
| 3 - 5 years-9+ years    | -26.638        | 18.630     | -1.430              | .153 | .917                   |

Each row tests the null hypothesis that the Sample 1 and Sample 2 distributions are the same.

Asymptotic significances (2-sided tests) are displayed. The significance level is .050.

a. Significance values have been adjusted by the Bonferroni correction for multiple tests.

Table 25. Pairwise comparison of significant KW Education Level for Question 1.

**Pairwise Comparisons of What is their highest education level?**

| Sample 1-Sample 2       | Test Statistic | Std. Error | Std. Test Statistic | Sig. | Adj. Sig. <sup>a</sup> |
|-------------------------|----------------|------------|---------------------|------|------------------------|
| Level 7 - 8-Level 5 - 6 | 33.346         | 16.224     | 2.055               | .040 | .239                   |
| Level 7 - 8-Level 1 - 2 | 42.944         | 20.184     | 2.128               | .033 | .200                   |
| Level 7 - 8-Level 3 - 4 | 43.192         | 15.992     | 2.701               | .007 | .041                   |
| Level 5 - 6-Level 1 - 2 | 9.598          | 20.796     | .462                | .644 | 1.000                  |
| Level 5 - 6-Level 3 - 4 | 9.846          | 16.759     | .587                | .557 | 1.000                  |
| Level 1 - 2-Level 3 - 4 | -.248          | 20.616     | -.012               | .990 | 1.000                  |

Each row tests the null hypothesis that the Sample 1 and Sample 2 distributions are the same.

Asymptotic significances (2-sided tests) are displayed. The significance level is .050.

a. Significance values have been adjusted by the Bonferroni correction for multiple tests.

Table 26. Pairwise comparison of significant KW Education Level for Question 2.

**Pairwise Comparisons of What is their highest education level?**

| Sample 1-Sample 2       | Test Statistic | Std. Error | Std. Test Statistic | Sig. | Adj. Sig. <sup>a</sup> |
|-------------------------|----------------|------------|---------------------|------|------------------------|
| Level 7 - 8-Level 5 - 6 | 9.144          | 16.210     | .564                | .573 | 1.000                  |
| Level 7 - 8-Level 3 - 4 | 34.072         | 15.978     | 2.132               | .033 | .198                   |
| Level 7 - 8-Level 1 - 2 | 47.371         | 20.166     | 2.349               | .019 | .113                   |
| Level 5 - 6-Level 3 - 4 | 24.928         | 16.744     | 1.489               | .137 | .819                   |
| Level 5 - 6-Level 1 - 2 | 38.227         | 20.779     | 1.840               | .066 | .395                   |
| Level 3 - 4-Level 1 - 2 | 13.298         | 20.598     | .646                | .519 | 1.000                  |

Each row tests the null hypothesis that the Sample 1 and Sample 2 distributions are the same.

Asymptotic significances (2-sided tests) are displayed. The significance level is .050.

a. Significance values have been adjusted by the Bonferroni correction for multiple tests.

Table 27. Pairwise comparison of significant KW Education Level for Question 6.

**Pairwise Comparisons of What is their highest education level?**

| Sample 1-Sample 2       | Test Statistic | Std. Error | Std. Test Statistic | Sig. | Adj. Sig. <sup>a</sup> |
|-------------------------|----------------|------------|---------------------|------|------------------------|
| Level 7 - 8-Level 5 - 6 | 15.056         | 16.313     | .923                | .356 | 1.000                  |
| Level 7 - 8-Level 3 - 4 | 45.459         | 16.079     | 2.827               | .005 | .028                   |
| Level 7 - 8-Level 1 - 2 | 52.903         | 20.294     | 2.607               | .009 | .055                   |
| Level 5 - 6-Level 3 - 4 | 30.403         | 16.850     | 1.804               | .071 | .427                   |
| Level 5 - 6-Level 1 - 2 | 37.848         | 20.910     | 1.810               | .070 | .422                   |
| Level 3 - 4-Level 1 - 2 | 7.445          | 20.729     | .359                | .719 | 1.000                  |

Each row tests the null hypothesis that the Sample 1 and Sample 2 distributions are the same.

Asymptotic significances (2-sided tests) are displayed. The significance level is .050.

a. Significance values have been adjusted by the Bonferroni correction for multiple tests.

## CENTRE-PD Top 10 Supplementary Material

Table 28. Pairwise comparison of significant KW Education Level for Question 8.

**Pairwise Comparisons of What is their highest education level?**

| Sample 1-Sample 2       | Test Statistic | Std. Error | Std. Test Statistic | Sig. | Adj. Sig. <sup>a</sup> |
|-------------------------|----------------|------------|---------------------|------|------------------------|
| Level 5 - 6-Level 7 - 8 | -5.576         | 16.338     | -.341               | .733 | 1.000                  |
| Level 5 - 6-Level 1 - 2 | 41.242         | 20.943     | 1.969               | .049 | .294                   |
| Level 5 - 6-Level 3 - 4 | 46.542         | 16.877     | 2.758               | .006 | .035                   |
| Level 7 - 8-Level 1 - 2 | 35.667         | 20.326     | 1.755               | .079 | .476                   |
| Level 7 - 8-Level 3 - 4 | 40.966         | 16.104     | 2.544               | .011 | .066                   |
| Level 1 - 2-Level 3 - 4 | -5.300         | 20.761     | -.255               | .799 | 1.000                  |

Each row tests the null hypothesis that the Sample 1 and Sample 2 distributions are the same.

Asymptotic significances (2-sided tests) are displayed. The significance level is .050.

a. Significance values have been adjusted by the Bonferroni correction for multiple tests.

Table 29. Pairwise comparison of significant KW Education Level for Question 10.

**Pairwise Comparisons of What is their highest education level?**

| Sample 1-Sample 2       | Test Statistic | Std. Error | Std. Test Statistic | Sig. | Adj. Sig. <sup>a</sup> |
|-------------------------|----------------|------------|---------------------|------|------------------------|
| Level 7 - 8-Level 5 - 6 | 26.177         | 16.431     | 1.593               | .111 | .667                   |
| Level 7 - 8-Level 3 - 4 | 44.349         | 16.196     | 2.738               | .006 | .037                   |
| Level 7 - 8-Level 1 - 2 | 88.634         | 20.441     | 4.336               | .000 | .000                   |
| Level 5 - 6-Level 3 - 4 | 18.172         | 16.972     | 1.071               | .284 | 1.000                  |
| Level 5 - 6-Level 1 - 2 | 62.457         | 21.062     | 2.965               | .003 | .018                   |
| Level 3 - 4-Level 1 - 2 | 44.285         | 20.879     | 2.121               | .034 | .204                   |

Each row tests the null hypothesis that the Sample 1 and Sample 2 distributions are the same.

Asymptotic significances (2-sided tests) are displayed. The significance level is .050.

a. Significance values have been adjusted by the Bonferroni correction for multiple tests.

Table 30. Pairwise comparison of significant KW Education Level for Question 11.

**Pairwise Comparisons of What is their highest education level?**

| Sample 1-Sample 2       | Test Statistic | Std. Error | Std. Test Statistic | Sig. | Adj. Sig. <sup>a</sup> |
|-------------------------|----------------|------------|---------------------|------|------------------------|
| Level 7 - 8-Level 5 - 6 | 20.802         | 16.359     | 1.272               | .204 | 1.000                  |
| Level 7 - 8-Level 3 - 4 | 48.662         | 16.126     | 3.018               | .003 | .015                   |
| Level 7 - 8-Level 1 - 2 | 59.869         | 20.352     | 2.942               | .003 | .020                   |
| Level 5 - 6-Level 3 - 4 | 27.860         | 16.899     | 1.649               | .099 | .595                   |
| Level 5 - 6-Level 1 - 2 | 39.066         | 20.970     | 1.863               | .062 | .375                   |
| Level 3 - 4-Level 1 - 2 | 11.206         | 20.788     | .539                | .590 | 1.000                  |

Each row tests the null hypothesis that the Sample 1 and Sample 2 distributions are the same.

Asymptotic significances (2-sided tests) are displayed. The significance level is .050.

a. Significance values have been adjusted by the Bonferroni correction for multiple tests.

Table 31. Pairwise comparison of significant KW Education Level for Question 12.

**Pairwise Comparisons of What is their highest education level?**

| Sample 1-Sample 2       | Test Statistic | Std. Error | Std. Test Statistic | Sig. | Adj. Sig. <sup>a</sup> |
|-------------------------|----------------|------------|---------------------|------|------------------------|
| Level 5 - 6-Level 7 - 8 | -20.583        | 16.349     | -1.259              | .208 | 1.000                  |
| Level 5 - 6-Level 3 - 4 | 43.937         | 16.888     | 2.602               | .009 | .056                   |
| Level 5 - 6-Level 1 - 2 | 50.020         | 20.956     | 2.387               | .017 | .102                   |
| Level 7 - 8-Level 3 - 4 | 23.354         | 16.115     | 1.449               | .147 | .884                   |
| Level 7 - 8-Level 1 - 2 | 29.437         | 20.339     | 1.447               | .148 | .887                   |
| Level 3 - 4-Level 1 - 2 | 6.083          | 20.775     | .293                | .770 | 1.000                  |

Each row tests the null hypothesis that the Sample 1 and Sample 2 distributions are the same.

Asymptotic significances (2-sided tests) are displayed. The significance level is .050.

a. Significance values have been adjusted by the Bonferroni correction for multiple tests.

## CENTRE-PD Top 10 Supplementary Material

Table 32. Pairwise comparison of significant KW Education Level for Question 15.

**Pairwise Comparisons of What is their highest education level?**

| Sample 1-Sample 2       | Test Statistic | Std. Error | Std. Test Statistic | Sig. | Adj. Sig. <sup>a</sup> |
|-------------------------|----------------|------------|---------------------|------|------------------------|
| Level 7 - 8-Level 5 - 6 | 15.901         | 16.422     | .968                | .333 | 1.000                  |
| Level 7 - 8-Level 3 - 4 | 43.749         | 16.187     | 2.703               | .007 | .041                   |
| Level 7 - 8-Level 1 - 2 | 56.421         | 20.430     | 2.762               | .006 | .035                   |
| Level 5 - 6-Level 3 - 4 | 27.848         | 16.963     | 1.642               | .101 | .604                   |
| Level 5 - 6-Level 1 - 2 | 40.520         | 21.051     | 1.925               | .054 | .325                   |
| Level 3 - 4-Level 1 - 2 | 12.672         | 20.868     | .607                | .544 | 1.000                  |

Each row tests the null hypothesis that the Sample 1 and Sample 2 distributions are the same.

Asymptotic significances (2-sided tests) are displayed. The significance level is .050.

a. Significance values have been adjusted by the Bonferroni correction for multiple tests.

Table 33. Pairwise comparison of significant KW Education Level for Question 16.

**Pairwise Comparisons of What is their highest education level?**

| Sample 1-Sample 2       | Test Statistic | Std. Error | Std. Test Statistic | Sig. | Adj. Sig. <sup>a</sup> |
|-------------------------|----------------|------------|---------------------|------|------------------------|
| Level 7 - 8-Level 5 - 6 | 18.679         | 16.379     | 1.140               | .254 | 1.000                  |
| Level 7 - 8-Level 3 - 4 | 41.464         | 16.145     | 2.568               | .010 | .061                   |
| Level 7 - 8-Level 1 - 2 | 81.487         | 20.376     | 3.999               | .000 | .000                   |
| Level 5 - 6-Level 3 - 4 | 22.785         | 16.919     | 1.347               | .178 | 1.000                  |
| Level 5 - 6-Level 1 - 2 | 62.809         | 20.995     | 2.992               | .003 | .017                   |
| Level 3 - 4-Level 1 - 2 | 40.023         | 20.813     | 1.923               | .054 | .327                   |

Each row tests the null hypothesis that the Sample 1 and Sample 2 distributions are the same.

Asymptotic significances (2-sided tests) are displayed. The significance level is .050.

a. Significance values have been adjusted by the Bonferroni correction for multiple tests.

Table 34. Pairwise comparison of significant KW Education Level for Question 17.

**Pairwise Comparisons of What is their highest education level?**

| Sample 1-Sample 2       | Test Statistic | Std. Error | Std. Test Statistic | Sig. | Adj. Sig. <sup>a</sup> |
|-------------------------|----------------|------------|---------------------|------|------------------------|
| Level 7 - 8-Level 5 - 6 | 54.895         | 16.464     | 3.334               | .001 | .005                   |
| Level 7 - 8-Level 3 - 4 | 68.367         | 16.229     | 4.213               | .000 | .000                   |
| Level 7 - 8-Level 1 - 2 | 98.266         | 20.483     | 4.798               | .000 | .000                   |
| Level 5 - 6-Level 3 - 4 | 13.471         | 17.007     | .792                | .428 | 1.000                  |
| Level 5 - 6-Level 1 - 2 | 43.371         | 21.104     | 2.055               | .040 | .239                   |
| Level 3 - 4-Level 1 - 2 | 29.900         | 20.921     | 1.429               | .153 | .918                   |

Each row tests the null hypothesis that the Sample 1 and Sample 2 distributions are the same.

Asymptotic significances (2-sided tests) are displayed. The significance level is .050.

a. Significance values have been adjusted by the Bonferroni correction for multiple tests.

Table 35. Pairwise comparison of significant KW Education Level for Question 18.

**Pairwise Comparisons of What is their highest education level?**

| Sample 1-Sample 2       | Test Statistic | Std. Error | Std. Test Statistic | Sig. | Adj. Sig. <sup>a</sup> |
|-------------------------|----------------|------------|---------------------|------|------------------------|
| Level 7 - 8-Level 5 - 6 | 41.617         | 16.381     | 2.541               | .011 | .066                   |
| Level 7 - 8-Level 3 - 4 | 53.936         | 16.147     | 3.340               | .001 | .005                   |
| Level 7 - 8-Level 1 - 2 | 76.063         | 20.379     | 3.732               | .000 | .001                   |
| Level 5 - 6-Level 3 - 4 | 12.318         | 16.921     | .728                | .467 | 1.000                  |
| Level 5 - 6-Level 1 - 2 | 34.445         | 20.998     | 1.640               | .101 | .605                   |
| Level 3 - 4-Level 1 - 2 | 22.127         | 20.815     | 1.063               | .288 | 1.000                  |

Each row tests the null hypothesis that the Sample 1 and Sample 2 distributions are the same.

Asymptotic significances (2-sided tests) are displayed. The significance level is .050.

a. Significance values have been adjusted by the Bonferroni correction for multiple tests.

## CENTRE-PD Top 10 Supplementary Material

Table 36. Pairwise comparison of significant KW Education Level for Question 19.

**Pairwise Comparisons of What is their highest education level?**

| Sample 1-Sample 2       | Test Statistic | Std. Error | Std. Test Statistic | Sig. | Adj. Sig. <sup>a</sup> |
|-------------------------|----------------|------------|---------------------|------|------------------------|
| Level 7 - 8-Level 1 - 2 | 34.781         | 19.958     | 1.743               | .081 | .488                   |
| Level 7 - 8-Level 5 - 6 | 39.973         | 16.042     | 2.492               | .013 | .076                   |
| Level 7 - 8-Level 3 - 4 | 41.481         | 15.813     | 2.623               | .009 | .052                   |
| Level 1 - 2-Level 5 - 6 | -5.191         | 20.563     | -.252               | .801 | 1.000                  |
| Level 1 - 2-Level 3 - 4 | -6.700         | 20.385     | -.329               | .742 | 1.000                  |
| Level 5 - 6-Level 3 - 4 | 1.509          | 16.571     | .091                | .927 | 1.000                  |

Each row tests the null hypothesis that the Sample 1 and Sample 2 distributions are the same.

Asymptotic significances (2-sided tests) are displayed. The significance level is .050.

a. Significance values have been adjusted by the Bonferroni correction for multiple tests.

Table 37. Pairwise comparison of significant KW Education Level for Question 20.

**Pairwise Comparisons of What is their highest education level?**

| Sample 1-Sample 2       | Test Statistic | Std. Error | Std. Test Statistic | Sig. | Adj. Sig. <sup>a</sup> |
|-------------------------|----------------|------------|---------------------|------|------------------------|
| Level 7 - 8-Level 5 - 6 | 9.380          | 16.279     | .576                | .564 | 1.000                  |
| Level 7 - 8-Level 1 - 2 | 46.493         | 20.253     | 2.296               | .022 | .130                   |
| Level 7 - 8-Level 3 - 4 | 61.676         | 16.047     | 3.844               | .000 | .001                   |
| Level 5 - 6-Level 1 - 2 | 37.113         | 20.868     | 1.779               | .075 | .452                   |
| Level 5 - 6-Level 3 - 4 | 52.296         | 16.816     | 3.110               | .002 | .011                   |
| Level 1 - 2-Level 3 - 4 | -15.182        | 20.686     | -.734               | .463 | 1.000                  |

Each row tests the null hypothesis that the Sample 1 and Sample 2 distributions are the same.

Asymptotic significances (2-sided tests) are displayed. The significance level is .050.

a. Significance values have been adjusted by the Bonferroni correction for multiple tests.

Table 38. Pairwise comparison of significant KW Education Level for Question 21.

**Pairwise Comparisons of What is their highest education level?**

| Sample 1-Sample 2       | Test Statistic | Std. Error | Std. Test Statistic | Sig. | Adj. Sig. <sup>a</sup> |
|-------------------------|----------------|------------|---------------------|------|------------------------|
| Level 5 - 6-Level 7 - 8 | -3.987         | 16.228     | -.246               | .806 | 1.000                  |
| Level 5 - 6-Level 3 - 4 | 40.673         | 16.762     | 2.426               | .015 | .091                   |
| Level 5 - 6-Level 1 - 2 | 52.379         | 20.801     | 2.518               | .012 | .071                   |
| Level 7 - 8-Level 3 - 4 | 36.686         | 15.995     | 2.294               | .022 | .131                   |
| Level 7 - 8-Level 1 - 2 | 48.392         | 20.188     | 2.397               | .017 | .099                   |
| Level 3 - 4-Level 1 - 2 | 11.706         | 20.621     | .568                | .570 | 1.000                  |

Each row tests the null hypothesis that the Sample 1 and Sample 2 distributions are the same.

Asymptotic significances (2-sided tests) are displayed. The significance level is .050.

a. Significance values have been adjusted by the Bonferroni correction for multiple tests.

Table 39. Pairwise comparison of significant KW Education Level for Question 22.

**Pairwise Comparisons of What is their highest education level?**

| Sample 1-Sample 2       | Test Statistic | Std. Error | Std. Test Statistic | Sig. | Adj. Sig. <sup>a</sup> |
|-------------------------|----------------|------------|---------------------|------|------------------------|
| Level 7 - 8-Level 5 - 6 | 8.198          | 16.498     | .497                | .619 | 1.000                  |
| Level 7 - 8-Level 3 - 4 | 48.578         | 16.263     | 2.987               | .003 | .017                   |
| Level 7 - 8-Level 1 - 2 | 82.558         | 20.525     | 4.022               | .000 | .000                   |
| Level 5 - 6-Level 3 - 4 | 40.380         | 17.042     | 2.369               | .018 | .107                   |
| Level 5 - 6-Level 1 - 2 | 74.359         | 21.148     | 3.516               | .000 | .003                   |
| Level 3 - 4-Level 1 - 2 | 33.979         | 20.965     | 1.621               | .105 | .630                   |

Each row tests the null hypothesis that the Sample 1 and Sample 2 distributions are the same.

Asymptotic significances (2-sided tests) are displayed. The significance level is .050.

a. Significance values have been adjusted by the Bonferroni correction for multiple tests.

## CENTRE-PD Top 10 Supplementary Material

Table 40. Pairwise comparison of significant KW Education Level for Question 23.

**Pairwise Comparisons of What is their highest education level?**

| Sample 1-Sample 2       | Test Statistic | Std. Error | Std. Test Statistic | Sig. | Adj. Sig. <sup>a</sup> |
|-------------------------|----------------|------------|---------------------|------|------------------------|
| Level 5 - 6-Level 7 - 8 | -2.274         | 16.275     | -.140               | .889 | 1.000                  |
| Level 5 - 6-Level 3 - 4 | 23.389         | 16.811     | 1.391               | .164 | .985                   |
| Level 5 - 6-Level 1 - 2 | 54.359         | 20.862     | 2.606               | .009 | .055                   |
| Level 7 - 8-Level 3 - 4 | 21.115         | 16.042     | 1.316               | .188 | 1.000                  |
| Level 7 - 8-Level 1 - 2 | 52.085         | 20.247     | 2.572               | .010 | .061                   |
| Level 3 - 4-Level 1 - 2 | 30.970         | 20.681     | 1.498               | .134 | .805                   |

Each row tests the null hypothesis that the Sample 1 and Sample 2 distributions are the same.

Asymptotic significances (2-sided tests) are displayed. The significance level is .050.

a. Significance values have been adjusted by the Bonferroni correction for multiple tests.

Table 41. Pairwise comparison of significant KW Education Level for Question 25.

**Pairwise Comparisons of What is their highest education level?**

| Sample 1-Sample 2       | Test Statistic | Std. Error | Std. Test Statistic | Sig. | Adj. Sig. <sup>a</sup> |
|-------------------------|----------------|------------|---------------------|------|------------------------|
| Level 7 - 8-Level 5 - 6 | 39.761         | 16.439     | 2.419               | .016 | .093                   |
| Level 7 - 8-Level 3 - 4 | 65.627         | 16.204     | 4.050               | .000 | .000                   |
| Level 7 - 8-Level 1 - 2 | 69.667         | 20.451     | 3.406               | .001 | .004                   |
| Level 5 - 6-Level 3 - 4 | 25.867         | 16.981     | 1.523               | .128 | .766                   |
| Level 5 - 6-Level 1 - 2 | 29.906         | 21.072     | 1.419               | .156 | .935                   |
| Level 3 - 4-Level 1 - 2 | 4.040          | 20.889     | .193                | .847 | 1.000                  |

Each row tests the null hypothesis that the Sample 1 and Sample 2 distributions are the same.

Asymptotic significances (2-sided tests) are displayed. The significance level is .050.

a. Significance values have been adjusted by the Bonferroni correction for multiple tests.

Table 42. Pairwise comparison of significant KW Education Level for Question 26.

**Pairwise Comparisons of What is their highest education level?**

| Sample 1-Sample 2       | Test Statistic | Std. Error | Std. Test Statistic | Sig. | Adj. Sig. <sup>a</sup> |
|-------------------------|----------------|------------|---------------------|------|------------------------|
| Level 7 - 8-Level 5 - 6 | 20.230         | 16.419     | 1.232               | .218 | 1.000                  |
| Level 7 - 8-Level 3 - 4 | 53.546         | 16.184     | 3.309               | .001 | .006                   |
| Level 7 - 8-Level 1 - 2 | 57.199         | 20.426     | 2.800               | .005 | .031                   |
| Level 5 - 6-Level 3 - 4 | 33.316         | 16.960     | 1.964               | .049 | .297                   |
| Level 5 - 6-Level 1 - 2 | 36.969         | 21.046     | 1.757               | .079 | .474                   |
| Level 3 - 4-Level 1 - 2 | 3.653          | 20.863     | .175                | .861 | 1.000                  |

Each row tests the null hypothesis that the Sample 1 and Sample 2 distributions are the same.

Asymptotic significances (2-sided tests) are displayed. The significance level is .050.

a. Significance values have been adjusted by the Bonferroni correction for multiple tests.

Table 43. Pairwise comparison of significant KW Education Level for Question 27.

**Pairwise Comparisons of What is their highest education level?**

| Sample 1-Sample 2       | Test Statistic | Std. Error | Std. Test Statistic | Sig. | Adj. Sig. <sup>a</sup> |
|-------------------------|----------------|------------|---------------------|------|------------------------|
| Level 7 - 8-Level 5 - 6 | 27.543         | 16.440     | 1.675               | .094 | .563                   |
| Level 7 - 8-Level 3 - 4 | 51.247         | 16.205     | 3.162               | .002 | .009                   |
| Level 7 - 8-Level 1 - 2 | 71.110         | 20.453     | 3.477               | .001 | .003                   |
| Level 5 - 6-Level 3 - 4 | 23.703         | 16.982     | 1.396               | .163 | .977                   |
| Level 5 - 6-Level 1 - 2 | 43.566         | 21.074     | 2.067               | .039 | .232                   |
| Level 3 - 4-Level 1 - 2 | 19.863         | 20.891     | .951                | .342 | 1.000                  |

Each row tests the null hypothesis that the Sample 1 and Sample 2 distributions are the same.

Asymptotic significances (2-sided tests) are displayed. The significance level is .050.

a. Significance values have been adjusted by the Bonferroni correction for multiple tests.



## CENTRE-PD Top 10 Supplementary Material

Table 44. Pairwise comparison of significant KW Living Arrangements for Question 5.

**Pairwise Comparisons of What are the living arrangements of the participant?**

| Sample 1-Sample 2                                       | Test Statistic | Std. Error | Std. Test Statistic | Sig. | Adj. Sig. <sup>a</sup> |
|---------------------------------------------------------|----------------|------------|---------------------|------|------------------------|
| Own home (independently)-Own home (supported by family) | -3.475         | 14.416     | -.241               | .810 | 1.000                  |
| Own home (independently)-SBC                            | -106.575       | 28.316     | -3.764              | .000 | .001                   |
| Own home (supported by family)-SBC                      | -103.100       | 29.950     | -3.442              | .001 | .002                   |

Each row tests the null hypothesis that the Sample 1 and Sample 2 distributions are the same.

Asymptotic significances (2-sided tests) are displayed. The significance level is .050.

a. Significance values have been adjusted by the Bonferroni correction for multiple ...

Table 45. Pairwise comparison of significant KW Living Arrangements for Question 7.

**Pairwise Comparisons of What are the living arrangements of the participant?**

| Sample 1-Sample 2                                       | Test Statistic | Std. Error | Std. Test Statistic | Sig. | Adj. Sig. <sup>a</sup> |
|---------------------------------------------------------|----------------|------------|---------------------|------|------------------------|
| Own home (supported by family)-Own home (independently) | 21.187         | 14.291     | 1.483               | .138 | .415                   |
| Own home (supported by family)-SBC                      | -86.875        | 29.690     | -2.926              | .003 | .010                   |
| Own home (independently)-SBC                            | -65.688        | 28.070     | -2.340              | .019 | .058                   |

Each row tests the null hypothesis that the Sample 1 and Sample 2 distributions are the same.

Asymptotic significances (2-sided tests) are displayed. The significance level is .050.

a. Significance values have been adjusted by the Bonferroni correction for multiple ...

Table 46. Pairwise comparison of significant KW Living Arrangements for Question 15.

**Pairwise Comparisons of What are the living arrangements of the participant?**

| Sample 1-Sample 2                                       | Test Statistic | Std. Error | Std. Test Statistic | Sig. | Adj. Sig. <sup>a</sup> |
|---------------------------------------------------------|----------------|------------|---------------------|------|------------------------|
| Own home (independently)-Own home (supported by family) | -2.566         | 14.429     | -.178               | .859 | 1.000                  |
| Own home (independently)-SBC                            | -70.963        | 28.341     | -2.504              | .012 | .037                   |
| Own home (supported by family)-SBC                      | -68.397        | 29.977     | -2.282              | .023 | .068                   |

Each row tests the null hypothesis that the Sample 1 and Sample 2 distributions are the same.

Asymptotic significances (2-sided tests) are displayed. The significance level is .050.

a. Significance values have been adjusted by the Bonferroni correction for multiple ...

Table 47. Pairwise comparison of significant KW Living Arrangements for Question 17.

**Pairwise Comparisons of What are the living arrangements of the participant?**

| Sample 1-Sample 2                                       | Test Statistic | Std. Error | Std. Test Statistic | Sig. | Adj. Sig. <sup>a</sup> |
|---------------------------------------------------------|----------------|------------|---------------------|------|------------------------|
| Own home (independently)-Own home (supported by family) | -2.566         | 14.429     | -.178               | .859 | 1.000                  |
| Own home (independently)-SBC                            | -70.963        | 28.341     | -2.504              | .012 | .037                   |
| Own home (supported by family)-SBC                      | -68.397        | 29.977     | -2.282              | .023 | .068                   |

Each row tests the null hypothesis that the Sample 1 and Sample 2 distributions are the same.

Asymptotic significances (2-sided tests) are displayed. The significance level is .050.

a. Significance values have been adjusted by the Bonferroni correction for multiple ...

## CENTRE-PD Top 10 Supplementary Material

Table 48. Pairwise comparison of significant KW Local Institute for Question 1.

**Pairwise Comparisons of Local Institute Country of Origin**

| Sample 1-Sample 2  | Test Statistic | Std. Error | Std. Test Statistic | Sig. | Adj. Sig. <sup>a</sup> |
|--------------------|----------------|------------|---------------------|------|------------------------|
| UK-Germany         | 21.763         | 22.257     | .978                | .328 | .985                   |
| UK-Luxembourg      | 119.038        | 18.740     | 6.352               | .000 | .000                   |
| Germany-Luxembourg | 97.275         | 23.321     | 4.171               | .000 | .000                   |

Each row tests the null hypothesis that the Sample 1 and Sample 2 distributions are the same.

Asymptotic significances (2-sided tests) are displayed. The significance level is .050.

a. Significance values have been adjusted by the Bonferroni correction for multiple tests.

Table 49. Pairwise comparison of significant KW Local Institute for Question 2.

**Pairwise Comparisons of Local Institute Country of Origin**

| Sample 1-Sample 2  | Test Statistic | Std. Error | Std. Test Statistic | Sig. | Adj. Sig. <sup>a</sup> |
|--------------------|----------------|------------|---------------------|------|------------------------|
| UK-Germany         | 6.002          | 22.058     | .272                | .786 | 1.000                  |
| UK-Luxembourg      | 113.746        | 18.573     | 6.124               | .000 | .000                   |
| Germany-Luxembourg | 107.744        | 23.112     | 4.662               | .000 | .000                   |

Each row tests the null hypothesis that the Sample 1 and Sample 2 distributions are the same.

Asymptotic significances (2-sided tests) are displayed. The significance level is .050.

a. Significance values have been adjusted by the Bonferroni correction for multiple tests.

Table 50. Pairwise comparison of significant KW Local Institute for Question 4.

**Pairwise Comparisons of Local Institute Country of Origin**

| Sample 1-Sample 2  | Test Statistic | Std. Error | Std. Test Statistic | Sig. | Adj. Sig. <sup>a</sup> |
|--------------------|----------------|------------|---------------------|------|------------------------|
| UK-Germany         | 94.481         | 22.247     | 4.247               | .000 | .000                   |
| UK-Luxembourg      | 108.551        | 18.731     | 5.795               | .000 | .000                   |
| Germany-Luxembourg | 14.070         | 23.309     | .604                | .546 | 1.000                  |

Each row tests the null hypothesis that the Sample 1 and Sample 2 distributions are the same.

Asymptotic significances (2-sided tests) are displayed. The significance level is .050.

a. Significance values have been adjusted by the Bonferroni correction for multiple tests.

Table 51. Pairwise comparison of significant KW Local Institute for Question 5.

**Pairwise Comparisons of Local Institute Country of Origin**

| Sample 1-Sample 2  | Test Statistic | Std. Error | Std. Test Statistic | Sig. | Adj. Sig. <sup>a</sup> |
|--------------------|----------------|------------|---------------------|------|------------------------|
| Germany-UK         | -51.890        | 22.617     | -2.294              | .022 | .065                   |
| Germany-Luxembourg | 125.238        | 23.698     | 5.285               | .000 | .000                   |
| UK-Luxembourg      | 73.348         | 19.043     | 3.852               | .000 | .000                   |

Each row tests the null hypothesis that the Sample 1 and Sample 2 distributions are the same.

Asymptotic significances (2-sided tests) are displayed. The significance level is .050.

a. Significance values have been adjusted by the Bonferroni correction for multiple tests.

Table 52. Pairwise comparison of significant KW Local Institute for Question 6.

**Pairwise Comparisons of Local Institute Country of Origin**

| Sample 1-Sample 2  | Test Statistic | Std. Error | Std. Test Statistic | Sig. | Adj. Sig. <sup>a</sup> |
|--------------------|----------------|------------|---------------------|------|------------------------|
| Germany-UK         | -18.782        | 22.484     | -.835               | .404 | 1.000                  |
| Germany-Luxembourg | 56.243         | 23.558     | 2.387               | .017 | .051                   |
| UK-Luxembourg      | 37.461         | 18.931     | 1.979               | .048 | .144                   |

Each row tests the null hypothesis that the Sample 1 and Sample 2 distributions are the same.

Asymptotic significances (2-sided tests) are displayed. The significance level is .050.

a. Significance values have been adjusted by the Bonferroni correction for multiple tests.

## CENTRE-PD Top 10 Supplementary Material

Table 53. Pairwise comparison of significant KW Local Institute for Question 7.

**Pairwise Comparisons of Local Institute Country of Origin**

| Sample 1–Sample 2  | Test Statistic | Std. Error | Std. Test Statistic | Sig. | Adj. Sig. <sup>a</sup> |
|--------------------|----------------|------------|---------------------|------|------------------------|
| UK–Germany         | 93.912         | 22.372     | 4.198               | .000 | .000                   |
| UK–Luxembourg      | 102.920        | 18.836     | 5.464               | .000 | .000                   |
| Germany–Luxembourg | 9.008          | 23.440     | .384                | .701 | 1.000                  |

Each row tests the null hypothesis that the Sample 1 and Sample 2 distributions are the same.

Asymptotic significances (2-sided tests) are displayed. The significance level is .050.

a. Significance values have been adjusted by the Bonferroni correction for multiple tests.

Table 54. Pairwise comparison of significant KW Local Institute for Question 8 .

**Pairwise Comparisons of Local Institute Country of Origin**

| Sample 1–Sample 2  | Test Statistic | Std. Error | Std. Test Statistic | Sig. | Adj. Sig. <sup>a</sup> |
|--------------------|----------------|------------|---------------------|------|------------------------|
| UK–Germany         | 57.958         | 22.531     | 2.572               | .010 | .030                   |
| UK–Luxembourg      | 94.994         | 18.970     | 5.007               | .000 | .000                   |
| Germany–Luxembourg | 37.036         | 23.607     | 1.569               | .117 | .350                   |

Each row tests the null hypothesis that the Sample 1 and Sample 2 distributions are the same.

Asymptotic significances (2-sided tests) are displayed. The significance level is .050.

a. Significance values have been adjusted by the Bonferroni correction for multiple tests.

Table 55. Pairwise comparison of significant KW Local Institute for Question 9

**Pairwise Comparisons of Local Institute Country of Origin**

| Sample 1–Sample 2  | Test Statistic | Std. Error | Std. Test Statistic | Sig. | Adj. Sig. <sup>a</sup> |
|--------------------|----------------|------------|---------------------|------|------------------------|
| UK–Germany         | 49.497         | 22.137     | 2.236               | .025 | .076                   |
| UK–Luxembourg      | 70.137         | 18.639     | 3.763               | .000 | .001                   |
| Germany–Luxembourg | 20.640         | 23.194     | .890                | .374 | 1.000                  |

Each row tests the null hypothesis that the Sample 1 and Sample 2 distributions are the same.

Asymptotic significances (2-sided tests) are displayed. The significance level is .050.

a. Significance values have been adjusted by the Bonferroni correction for multiple tests.

Table 56. Pairwise comparison of significant KW Local Institute for Question 10

**Pairwise Comparisons of Local Institute Country of Origin**

| Sample 1–Sample 2  | Test Statistic | Std. Error | Std. Test Statistic | Sig. | Adj. Sig. <sup>a</sup> |
|--------------------|----------------|------------|---------------------|------|------------------------|
| UK–Germany         | 1.834          | 22.589     | .081                | .935 | 1.000                  |
| UK–Luxembourg      | 84.278         | 19.020     | 4.431               | .000 | .000                   |
| Germany–Luxembourg | 82.445         | 23.668     | 3.483               | .000 | .001                   |

Each row tests the null hypothesis that the Sample 1 and Sample 2 distributions are the same.

Asymptotic significances (2-sided tests) are displayed. The significance level is .050.

a. Significance values have been adjusted by the Bonferroni correction for multiple tests.

Table 57. Pairwise comparison of significant KW Local Institute for Question 11.

**Pairwise Comparisons of Local Institute Country of Origin**

| Sample 1–Sample 2  | Test Statistic | Std. Error | Std. Test Statistic | Sig. | Adj. Sig. <sup>a</sup> |
|--------------------|----------------|------------|---------------------|------|------------------------|
| UK–Germany         | 11.778         | 22.534     | .523                | .601 | 1.000                  |
| UK–Luxembourg      | 83.648         | 18.973     | 4.409               | .000 | .000                   |
| Germany–Luxembourg | 71.870         | 23.610     | 3.044               | .002 | .007                   |

Each row tests the null hypothesis that the Sample 1 and Sample 2 distributions are the same.

Asymptotic significances (2-sided tests) are displayed. The significance level is .050.

a. Significance values have been adjusted by the Bonferroni correction for multiple tests.

## CENTRE-PD Top 10 Supplementary Material

Table 58. Pairwise comparison of significant KW Local Institute for Question 12.

**Pairwise Comparisons of Local Institute Country of Origin**

| Sample 1–Sample 2  | Test Statistic | Std. Error | Std. Test Statistic | Sig. | Adj. Sig. <sup>a</sup> |
|--------------------|----------------|------------|---------------------|------|------------------------|
| UK–Germany         | 63.105         | 22.385     | 2.819               | .005 | .014                   |
| UK–Luxembourg      | 109.029        | 18.848     | 5.785               | .000 | .000                   |
| Germany–Luxembourg | 45.924         | 23.454     | 1.958               | .050 | .151                   |

Each row tests the null hypothesis that the Sample 1 and Sample 2 distributions are the same.

Asymptotic significances (2-sided tests) are displayed. The significance level is .050.

a. Significance values have been adjusted by the Bonferroni correction for multiple tests.

Table 59. Pairwise comparison of significant KW Local Institute for Question 13.

**Pairwise Comparisons of Local Institute Country of Origin**

| Sample 1–Sample 2  | Test Statistic | Std. Error | Std. Test Statistic | Sig. | Adj. Sig. <sup>a</sup> |
|--------------------|----------------|------------|---------------------|------|------------------------|
| UK–Luxembourg      | 120.078        | 19.023     | 6.312               | .000 | .000                   |
| UK–Germany         | 153.041        | 22.594     | 6.774               | .000 | .000                   |
| Luxembourg–Germany | -32.963        | 23.673     | -1.392              | .164 | .491                   |

Each row tests the null hypothesis that the Sample 1 and Sample 2 distributions are the same.

Asymptotic significances (2-sided tests) are displayed. The significance level is .050.

a. Significance values have been adjusted by the Bonferroni correction for multiple tests.

Table 60. Pairwise comparison of significant KW Local Institute for Question 14.

**Pairwise Comparisons of Local Institute Country of Origin**

| Sample 1–Sample 2  | Test Statistic | Std. Error | Std. Test Statistic | Sig. | Adj. Sig. <sup>a</sup> |
|--------------------|----------------|------------|---------------------|------|------------------------|
| UK–Germany         | 70.164         | 22.520     | 3.116               | .002 | .006                   |
| UK–Luxembourg      | 141.840        | 18.961     | 7.481               | .000 | .000                   |
| Germany–Luxembourg | 71.676         | 23.595     | 3.038               | .002 | .007                   |

Each row tests the null hypothesis that the Sample 1 and Sample 2 distributions are the same.

Asymptotic significances (2-sided tests) are displayed. The significance level is .050.

a. Significance values have been adjusted by the Bonferroni correction for multiple tests.

Table 61. Pairwise comparison of significant KW Local Institute for Question 15.

**Pairwise Comparisons of Local Institute Country of Origin**

| Sample 1–Sample 2  | Test Statistic | Std. Error | Std. Test Statistic | Sig. | Adj. Sig. <sup>a</sup> |
|--------------------|----------------|------------|---------------------|------|------------------------|
| UK–Germany         | 9.039          | 22.549     | .401                | .689 | 1.000                  |
| UK–Luxembourg      | 144.470        | 18.986     | 7.609               | .000 | .000                   |
| Germany–Luxembourg | 135.431        | 23.626     | 5.732               | .000 | .000                   |

Each row tests the null hypothesis that the Sample 1 and Sample 2 distributions are the same.

Asymptotic significances (2-sided tests) are displayed. The significance level is .050.

a. Significance values have been adjusted by the Bonferroni correction for multiple tests.

Table 62. Pairwise comparison of significant KW Local Institute for Question 16.

**Pairwise Comparisons of Local Institute Country of Origin**

| Sample 1–Sample 2  | Test Statistic | Std. Error | Std. Test Statistic | Sig. | Adj. Sig. <sup>a</sup> |
|--------------------|----------------|------------|---------------------|------|------------------------|
| Germany–UK         | -56.909        | 22.577     | -2.521              | .012 | .035                   |
| Germany–Luxembourg | 78.865         | 23.655     | 3.334               | .001 | .003                   |
| UK–Luxembourg      | 21.956         | 19.009     | 1.155               | .248 | .744                   |

Each row tests the null hypothesis that the Sample 1 and Sample 2 distributions are the same.

Asymptotic significances (2-sided tests) are displayed. The significance level is .050.

a. Significance values have been adjusted by the Bonferroni correction for multiple tests.

## CENTRE-PD Top 10 Supplementary Material

Table 63. Pairwise comparison of significant KW Local Institute for Question 17.

**Pairwise Comparisons of Local Institute Country of Origin**

| Sample 1–Sample 2  | Test Statistic | Std. Error | Std. Test Statistic | Sig. | Adj. Sig. <sup>a</sup> |
|--------------------|----------------|------------|---------------------|------|------------------------|
| Germany–UK         | -35.418        | 22.636     | -1.565              | .118 | .353                   |
| Germany–Luxembourg | 107.128        | 23.717     | 4.517               | .000 | .000                   |
| UK–Luxembourg      | 71.710         | 19.059     | 3.762               | .000 | .001                   |

Each row tests the null hypothesis that the Sample 1 and Sample 2 distributions are the same.

Asymptotic significances (2-sided tests) are displayed. The significance level is .050.

a. Significance values have been adjusted by the Bonferroni correction for multiple tests.

Table 64. Pairwise comparison of significant KW Local Institute for Question 18.

**Pairwise Comparisons of Local Institute Country of Origin**

| Sample 1–Sample 2  | Test Statistic | Std. Error | Std. Test Statistic | Sig. | Adj. Sig. <sup>a</sup> |
|--------------------|----------------|------------|---------------------|------|------------------------|
| UK–Germany         | 14.288         | 22.577     | .633                | .527 | 1.000                  |
| UK–Luxembourg      | 89.761         | 19.010     | 4.722               | .000 | .000                   |
| Germany–Luxembourg | 75.473         | 23.656     | 3.190               | .001 | .004                   |

Each row tests the null hypothesis that the Sample 1 and Sample 2 distributions are the same.

Asymptotic significances (2-sided tests) are displayed. The significance level is .050.

a. Significance values have been adjusted by the Bonferroni correction for multiple tests.

Table 65. Pairwise comparison of significant KW Local Institute for Question 19.

**Pairwise Comparisons of Local Institute Country of Origin**

| Sample 1–Sample 2  | Test Statistic | Std. Error | Std. Test Statistic | Sig. | Adj. Sig. <sup>a</sup> |
|--------------------|----------------|------------|---------------------|------|------------------------|
| UK–Luxembourg      | 54.551         | 18.688     | 2.919               | .004 | .011                   |
| UK–Germany         | 79.800         | 22.196     | 3.595               | .000 | .001                   |
| Luxembourg–Germany | -25.248        | 23.256     | -1.086              | .278 | .833                   |

Each row tests the null hypothesis that the Sample 1 and Sample 2 distributions are the same.

Asymptotic significances (2-sided tests) are displayed. The significance level is .050.

a. Significance values have been adjusted by the Bonferroni correction for multiple tests.

Table 66. Pairwise comparison of significant KW Local Institute for Question 20.

**Pairwise Comparisons of Local Institute Country of Origin**

| Sample 1–Sample 2  | Test Statistic | Std. Error | Std. Test Statistic | Sig. | Adj. Sig. <sup>a</sup> |
|--------------------|----------------|------------|---------------------|------|------------------------|
| UK–Luxembourg      | 135.930        | 18.935     | 7.179               | .000 | .000                   |
| UK–Germany         | 140.596        | 22.488     | 6.252               | .000 | .000                   |
| Luxembourg–Germany | -4.666         | 23.562     | -.198               | .843 | 1.000                  |

Each row tests the null hypothesis that the Sample 1 and Sample 2 distributions are the same.

Asymptotic significances (2-sided tests) are displayed. The significance level is .050.

a. Significance values have been adjusted by the Bonferroni correction for multiple tests.

Table 67. Pairwise comparison of significant KW Local Institute for Question 21.

**Pairwise Comparisons of Local Institute Country of Origin**

| Sample 1–Sample 2  | Test Statistic | Std. Error | Std. Test Statistic | Sig. | Adj. Sig. <sup>a</sup> |
|--------------------|----------------|------------|---------------------|------|------------------------|
| UK–Germany         | 45.247         | 22.340     | 2.025               | .043 | .128                   |
| UK–Luxembourg      | 60.606         | 18.810     | 3.222               | .001 | .004                   |
| Germany–Luxembourg | 15.360         | 23.407     | .656                | .512 | 1.000                  |

Each row tests the null hypothesis that the Sample 1 and Sample 2 distributions are the same.

Asymptotic significances (2-sided tests) are displayed. The significance level is .050.

a. Significance values have been adjusted by the Bonferroni correction for multiple tests.

## CENTRE-PD Top 10 Supplementary Material

Table 68. Pairwise comparison of significant KW Local Institute for Question 22.

**Pairwise Comparisons of Local Institute Country of Origin**

| Sample 1–Sample 2  | Test Statistic | Std. Error | Std. Test Statistic | Sig. | Adj. Sig. <sup>a</sup> |
|--------------------|----------------|------------|---------------------|------|------------------------|
| UK–Germany         | 53.300         | 22.708     | 2.347               | .019 | .057                   |
| UK–Luxembourg      | 154.569        | 19.120     | 8.084               | .000 | .000                   |
| Germany–Luxembourg | 101.269        | 23.793     | 4.256               | .000 | .000                   |

Each row tests the null hypothesis that the Sample 1 and Sample 2 distributions are the same.

Asymptotic significances (2-sided tests) are displayed. The significance level is .050.

a. Significance values have been adjusted by the Bonferroni correction for multiple tests.

Table 69. Pairwise comparison of significant KW Local Institute for Question 23.

**Pairwise Comparisons of Local Institute Country of Origin**

| Sample 1–Sample 2  | Test Statistic | Std. Error | Std. Test Statistic | Sig. | Adj. Sig. <sup>a</sup> |
|--------------------|----------------|------------|---------------------|------|------------------------|
| UK–Germany         | 112.934        | 22.429     | 5.035               | .000 | .000                   |
| UK–Luxembourg      | 140.724        | 18.885     | 7.452               | .000 | .000                   |
| Germany–Luxembourg | 27.790         | 23.501     | 1.183               | .237 | .711                   |

Each row tests the null hypothesis that the Sample 1 and Sample 2 distributions are the same.

Asymptotic significances (2-sided tests) are displayed. The significance level is .050.

a. Significance values have been adjusted by the Bonferroni correction for multiple tests.

Table 70. Pairwise comparison of significant KW Local Institute for Question 24.

**Pairwise Comparisons of Local Institute Country of Origin**

| Sample 1–Sample 2  | Test Statistic | Std. Error | Std. Test Statistic | Sig. | Adj. Sig. <sup>a</sup> |
|--------------------|----------------|------------|---------------------|------|------------------------|
| UK–Germany         | 78.873         | 22.591     | 3.491               | .000 | .001                   |
| UK–Luxembourg      | 130.968        | 19.021     | 6.885               | .000 | .000                   |
| Germany–Luxembourg | 52.095         | 23.671     | 2.201               | .028 | .083                   |

Each row tests the null hypothesis that the Sample 1 and Sample 2 distributions are the same.

Asymptotic significances (2-sided tests) are displayed. The significance level is .050.

a. Significance values have been adjusted by the Bonferroni correction for multiple tests.

Table 71. Pairwise comparison of significant KW Local Institute for Question 25.

**Pairwise Comparisons of Local Institute Country of Origin**

| Sample 1–Sample 2  | Test Statistic | Std. Error | Std. Test Statistic | Sig. | Adj. Sig. <sup>a</sup> |
|--------------------|----------------|------------|---------------------|------|------------------------|
| UK–Germany         | 54.535         | 22.619     | 2.411               | .016 | .048                   |
| UK–Luxembourg      | 124.211        | 19.044     | 6.522               | .000 | .000                   |
| Germany–Luxembourg | 69.677         | 23.699     | 2.940               | .003 | .010                   |

Each row tests the null hypothesis that the Sample 1 and Sample 2 distributions are the same.

Asymptotic significances (2-sided tests) are displayed. The significance level is .050.

a. Significance values have been adjusted by the Bonferroni correction for multiple tests.

Table 72. Pairwise comparison of significant KW Local Institute for Question 26.

**Pairwise Comparisons of Local Institute Country of Origin**

| Sample 1–Sample 2  | Test Statistic | Std. Error | Std. Test Statistic | Sig. | Adj. Sig. <sup>a</sup> |
|--------------------|----------------|------------|---------------------|------|------------------------|
| UK–Germany         | 29.962         | 22.574     | 1.327               | .184 | .553                   |
| UK–Luxembourg      | 89.675         | 19.007     | 4.718               | .000 | .000                   |
| Germany–Luxembourg | 59.713         | 23.652     | 2.525               | .012 | .035                   |

Each row tests the null hypothesis that the Sample 1 and Sample 2 distributions are the same.

Asymptotic significances (2-sided tests) are displayed. The significance level is .050.

a. Significance values have been adjusted by the Bonferroni correction for multiple tests.

## CENTRE-PD Top 10 Supplementary Material

Table 73. Pairwise comparison of significant KW Local Institute for Question 27.

**Pairwise Comparisons of Local Institute Country of Origin**

| Sample 1-Sample 2  | Test Statistic | Std. Error | Std. Test Statistic | Sig. | Adj. Sig. <sup>a</sup> |
|--------------------|----------------|------------|---------------------|------|------------------------|
| UK-Germany         | 62.790         | 22.614     | 2.777               | .005 | .016                   |
| UK-Luxembourg      | 105.430        | 19.040     | 5.537               | .000 | .000                   |
| Germany-Luxembourg | 42.640         | 23.694     | 1.800               | .072 | .216                   |

Each row tests the null hypothesis that the Sample 1 and Sample 2 distributions are the same.

Asymptotic significances (2-sided tests) are displayed. The significance level is .050.

a. Significance values have been adjusted by the Bonferroni correction for multiple tests.
